1           **ER exit sites in *Drosophila* display abundant ER-**  
2           **Golgi vesicles and pearled tubes but no**  
3           **megacarriers**

4  
5           Ke Yang<sup>1†</sup>, Min Liu<sup>1†</sup>, Zhi Feng<sup>1</sup>, Marta Rojas<sup>2</sup>, Lingjian Zhou<sup>1</sup>,  
6           Hongmei Ke<sup>1</sup> and José Carlos Pastor-Pareja<sup>1,3\*</sup>

7  
8                           <sup>1</sup> School of Life Sciences, Tsinghua University, Beijing, China

9                           <sup>2</sup> School of Medicine, Tsinghua University, Beijing, China

10                           <sup>3</sup> Tsinghua-Peking Center for Life Sciences, Beijing, China

11

12                           † These authors contributed equally to this work

13                           \* Correspondence: [josepastor@tsinghua.edu.cn](mailto:josepastor@tsinghua.edu.cn)

14

15           Contact:

16           José Carlos Pastor-Pareja

17           School of Life Sciences, Tsinghua University

18           Medical Science Bldg., D224

19           Beijing 100084, China

20           Tel: (+86) 10-627-83498

21           <http://joselab.life.tsinghua.edu.cn>

22           ORCID: 0000-0002-3823-4473

23 **Abstract**

24 Secretory cargos are collected at ER exit sites (ERES) before transport to the Golgi  
25 apparatus. Decades of research have provided many details of the molecular events  
26 underlying ER-Golgi exchanges. Essential questions, however, remain about the  
27 organization of the ER-Golgi interface in cells and the type of membrane structures  
28 mediating traffic from ERES. To investigate these, we used transgenic tagging in  
29 *Drosophila* flies, 3D-SIM and FIB-SEM to characterize ERES-Golgi units in collagen-  
30 producing fat body, imaginal discs and imaginal discs overexpressing ERES determinant  
31 Tango1. We found in front of ERES a pre-cis-Golgi region involved in both anterograde  
32 and retrograde transport. This pre-cis-Golgi is continuous with the rest of the Golgi, not a  
33 separate intermediate compartment or collection of large carriers, for which we found no  
34 evidence. We found, however, many vesicles, as well as pearled tubules connecting ERES  
35 and Golgi.

36 **Short title:**

37 Architecture of the ER-Golgi interface

38 **Keywords**

39 Traffic, secretion, intermediate compartment, ERGIC, Golgi, Tango1

## 40 INTRODUCTION

41 Secretion is one of the most vital processes in the morphogenesis and physiology of  
42 eukaryotic organisms, both unicellular and multicellular. In the early secretory pathway,  
43 the exit of protein cargos from the endoplasmic reticulum (ER) takes place at specialized  
44 ER regions called ER exit sites (ERES), where proteins destined to be secreted are collected  
45 prior to their trafficking to the Golgi apparatus (Bannykh et al., 1996). ER-Golgi cargo  
46 transfer is the most regulated step in secretion, requiring localized action at ERES of  
47 dozens of membrane budding and fusion regulators. Among these, budding of Golgi-  
48 bound membrane carriers at ERES is known to involve the COPII coat complex, a set of  
49 proteins highly conserved in eukaryotes (Jensen and Schekman, 2011). In these same  
50 ERES regions, in addition, traffic in the reverse Golgi-ER direction through COPI vesicles is  
51 thought to concentrate as well (Roy Chowdhury et al., 2020). Despite their highly dynamic  
52 underlying nature, live imaging has repeatedly shown that ERES are relatively long-lived,  
53 stable entities (daSilva et al., 2004; Hammond and Glick, 2000; Shindiapina and Barlowe,  
54 2010; Westrate et al., 2020). Decades of research have given us a detailed view of the  
55 molecular events underlying ER-Golgi exchanges from the genetic and biochemical  
56 perspectives (Bard et al., 2006; Barlowe and Miller, 2013; Lee et al., 2004). Essential  
57 questions, however, remain about the functional organization of the ER-Golgi interface in  
58 living cells and the type of membrane structures effectively mediating ER-Golgi traffic  
59 from ERES.

60 Functional organization of the ER-Golgi interface appears to show striking differences  
61 across the evolutionary scale. In fission yeasts, protozoa and plants, Golgi stacks remain  
62 disseminated throughout the cytoplasm in close proximity to ERES, forming ERES-Golgi  
63 units (Brandizzi and Barlowe, 2013; Glick and Nakano, 2009). Invertebrate animals such  
64 as the fruit fly *Drosophila melanogaster* (Kondylis and Rabouille, 2003; Ripoche et al.,  
65 1994) and the nematode *Caenorhabditis elegans* (Witte et al., 2011) share this type of  
66 organization into discrete ERES-Golgi units. In vertebrates, in contrast, vesicles derived  
67 from the dispersed ERES fuse to form an ER-Golgi intermediate compartment (ERGIC),  
68 through which cargo transits to a single juxtannuclear Golgi ribbon located next to the  
69 centrosome (Appenzeller-Herzog and Hauri, 2006). Importantly, the status of the ERGIC  
70 as a stable compartment or a transient collection of carriers is unclear. The prevailing view  
71 is that it evolved in the larger-sized vertebrate cells as a specialized organelle that,  
72 together with the centralized Golgi, optimizes long-distance communication between the  
73 perinuclear ER and the plasma membrane (Brandizzi and Barlowe, 2013). However, this  
74 is difficult to reconcile with the high conservation of all machineries that regulate ER-Golgi  
75 traffic, from yeast to humans and all animals (Saraste and Marie, 2018). Furthermore,  
76 electron microscopy studies of *Drosophila* ERES-Golgi units have reported the existence

77 of pleiomorphic elements in the reduced space between ERES and Golgi (Kondylis et al.,  
78 2005), raising the possibility that an ancestral intermediate compartment exists in ERES-  
79 Golgi units of *Drosophila* and other organisms.

80 Another set of unresolved questions in our understanding of the ER-Golgi interface relate  
81 to the nature of membrane carriers generated therein. In vitro studies indicate that the  
82 COPII machinery directs budding of anterograde vesicles through assembly of a vesicle-  
83 coating cage 60-80 nm in diameter (Barlowe et al., 1994; Matsuoka et al., 1998). Reports  
84 of COPII vesicles in this size range in cells exist (Bykov et al., 2017; Hughes et al., 2009;  
85 Zeuschner et al., 2006), but are rare compared to the numerous studies documenting  
86 COPI and Clathrin vesicles (Langhans et al., 2012). This has for long time raised  
87 speculations on whether structures different from regular-sized COPII vesicles mediate  
88 ER-Golgi transport (Mironov and Beznoussenko, 2019; Robinson et al., 2015). Indeed,  
89 many protein cargos are secreted in animal cells that exceed by far the dimensions of a  
90 60-80 nm vesicle (Fromme and Schekman, 2005). Examples of these include collagens,  
91 the main components of animal extracellular matrices, for which trimers assemble inside  
92 the ER into 300-400 nm long rods (Canty and Kadler, 2005). Conflicting recent studies  
93 describe existence (Gorur et al., 2017; Jin et al., 2012; Matsui et al., 2020; Melville et al.,  
94 2019; Raote et al., 2017; Santos et al., 2015; Yuan et al., 2018) or absence (McCaughey et  
95 al., 2019; Omari et al., 2020) of large megavesicle carriers involved in ER-Golgi collagen  
96 transport. To visualize collagen traffic from ERES, these studies prevented collagen  
97 trimerization through ascorbate depletion, followed by ascorbate readministration to  
98 trigger resumption of transport. This has been shown to cause ER-phagy (Omari et al.,  
99 2018), complicating the interpretation of structures formed under these conditions. The  
100 alternative to megavesicle carriers as mediators of large cargo transport is direct ER-Golgi  
101 connection, for which some evidence exists in budding yeast (Kurokawa et al., 2014) and  
102 plants (daSilva et al., 2004). ERES-ERGIC contact has been proposed as a transport  
103 mechanism in mammalian cells as well (Malhotra and Erlmann, 2015; Raote and Malhotra,  
104 2021). To date, nonetheless, the existence of each of these types of structures at ERES,  
105 namely regular-sized vesicles, megacarriers and/or ER-Golgi connections remains a  
106 subject of intense debate.

107 Yeast has provided for many years a genetically tractable system to research secretion  
108 (Barlowe and Miller, 2013; Schekman, 2010). *Drosophila*, however, is increasingly  
109 becoming an excellent model to dissect secretion in higher eukaryotes and animals. Most  
110 studied proteins involved in secretion have fly homologues, including COPI and COPII  
111 components, Rab-GTPases, SNAREs, TRAPP complex, p24 proteins and golgins (Kondylis  
112 and Rabouille, 2009). Gene redundancy in these core machineries, however, is very  
113 limited when compared to mice or humans. Another advantage of *Drosophila* is the

114 availability of precise genetic tools that allow transgenic protein tagging, forward genetic  
115 screening, and loss- and gain-of function experiments. Genetic screenings using these  
116 tools have identified conserved new secretory genes (Bard et al., 2006; Ke et al., 2018;  
117 Kondylis et al., 2011; Tiwari et al., 2015; Wendler et al., 2010). Among these, Tango1, an  
118 ERES-localized transmembrane protein of the metazoan MIA/cTAGE (Melanoma  
119 Inhibitory Activity/Cutaneous T-cell lymphoma-associated antiGEn) family, has been  
120 shown to function in ERES definition and ERES-Golgi coordination, in addition to  
121 postulated roles in collagen transport (Feng et al., 2021; Malhotra and Erlmann, 2015).  
122 *Drosophila* is, in addition, a convenient model to investigate the biology of collagen and  
123 the extracellular matrix (Pastor-Pareja, 2020). Flies do not possess fibrillar collagens, but  
124 produce Collagen IV, the main component of basement membranes (Davis et al., 2019).  
125 *Drosophila* Collagen IV, a 450 nm-long heterotrimer, is abundantly present in all fly tissues  
126 (Lunstrum et al., 1988). In the larva, the main source of Collagen IV is fat body adipocytes,  
127 while other tissues such as imaginal discs, precursors of the adult epidermis, do not  
128 produce any (Pastor-Pareja and Xu, 2011). Interestingly, ERES of the Collagen IV-  
129 producing fat body are significantly larger than imaginal disc ERES (Liu et al., 2017).  
130 However, a detailed comparative study of the ER-Golgi interface in the fat body has not  
131 been carried out.

132 To better understand secretory pathway organization and ER-Golgi traffic, we used  
133 structured illumination microscopy (SIM) and focused ion beam scanning electron  
134 microscopy (FIB-SEM) to characterize *Drosophila* ERES-Golgi units. We found in front of  
135 ERES a pre-cis-Golgi compartment through which both anterograde and retrograde  
136 transport pass. This pre-cis-Golgi is continuous with the rest of the Golgi and not a  
137 separate intermediate compartment or a collection of large membrane carriers, for which  
138 we found no evidence. In every ERES analyzed through FIB-SEM, however, we found  
139 vesicles, as well as tubules extending between ERES and Golgi.

## 140 RESULTS

### 141 Regionalization within *Drosophila* ERES-Golgi units

142 In order to better understand secretory pathway organization and gain insights into the  
143 mechanisms underlying secretory traffic at the ER-Golgi interface, we decided to study  
144 the organization of ERES-Golgi units in *Drosophila* through different high-resolution  
145 imaging techniques. To do that, we first imaged secretory pathway markers in larval fat  
146 body using superresolution 3D-SIM (Three-Dimensional Structured Illumination  
147 Microscopy) in ERES-Golgi units of the fat body, the main source of collagen and other  
148 extracellular matrix proteins in the fly larva. Consistent, with our previous observations  
149 (Liu et al., 2017), Tango1 colocalized with ERES marker Sec16 in multiple irregularly-  
150 shaped structures per cell, usually about 1  $\mu\text{m}$  micron in diameter (Figure 1A and B). Golgi  
151 Microtubule Associated Protein (GMAP), Mannosidase II (ManII) and  
152 Galactosyltransferase (GalT), conserved markers for cis-, mid- and trans- regions of the  
153 Golgi apparatus, respectively, showed close but distinct localization within ERES-Golgi  
154 units (Figure 1C), showing that, despite its small size, the Golgi element in ERES-Golgi units  
155 is regionalized. Furthermore, localization of GMAP and additional cis-Golgi protein  
156 GM130 was clearly resolvable, with GM130 present in a position more proximal to ERES  
157 than GMAP (Figure 1D). Localization of Grasp65, a third conserved cis-Golgi-associated  
158 protein, largely overlapped that of GM130 (Figure 1E). From these data, we conclude that  
159 ERES-Golgi units in *Drosophila* contain, in addition to trans-, mid- and cis- regions, a fourth  
160 cis-most region that we call pre-cis-Golgi (Figure 1F).

### 161 COPI and COPII distribution within ERES-Golgi units

162 The COPII (anterograde) and COPI (retrograde) coat machineries for vesicle budding are  
163 essential for secretory transport in eukaryotes (Barlowe and Miller, 2013). To investigate  
164 the functional organization of the ER-Golgi interface and the role of the pre-cis-Golgi  
165 compartment, we studied the localization within ERES-Golgi units of COPI and COPII  
166 proteins. To do that, we created transgenic flies expressing tagged versions of COPI coat  
167 protein  $\gamma\text{COP}$ , COPI-GTPase Arf1, COPII coat protein Sec13 and COPII-GTPase Sar1. The  
168 transgenic versions we constructed of these proteins included dual GFP/APEX2 tags for  
169 use in both light and electron microscopy. The tagged proteins, when expressed in the  
170 larval fat body, exhibited cytoplasmic localization with clear concentrations in ERES-Golgi  
171 units and no apparent effects on cellular health or animal viability. Therefore, we  
172 proceeded to study in more detail their localization within ERES-Golgi units through 3D-  
173 SIM in combination with additional markers.  $\gamma\text{COP}$  signal highlighted structures  
174 resembling the ERES element in ERES-Golgi units, and indeed its localization closely

175 paralleled the localization of ERES marker Tango1 (Figure 2A). COPI GTPase Arf1, in  
176 contrast, localized to the Golgi apparatus, as shown by colocalization with mid-Golgi  
177 marker ManII (Figure 2B). Regarding the localization of COPII proteins, both coat  
178 component Sec13 and GTPase Sar1 were found to localize to cis-Golgi; however, Sec13  
179 was found to resemble most closely pre-cis-Golgi Grasp65 (Figure 2C), whereas COPII  
180 GTPase Sar1 showed colocalization with proper cis-Golgi marker GMAP (Figure 2D). These  
181 results indicate that COPI and COPII components localize to ERES-Golgi unit, where they  
182 tend to concentrate in different specific regions (Figure 2E).

183 To confirm our assessment of COPI and COPII localization and better place them within  
184 the ERES-Golgi unit, we imaged these proteins also through their APEX tags, capable of  
185 producing upon reaction with DAB dark deposits that can be visualized through  
186 transmission electron microscopy (TEM) (Martell et al., 2017). Besides fat body, we  
187 analyzed cells of the wing imaginal discs, the larval precursors of the adult wing epidermis.  
188 ERES-Golgi units could be recognized in both tissues as discrete ER regions partially  
189 surrounding compact clusters of complex membrane elements, as confirmed by the  
190 localization of APEX fusions for ERES Tango1 (Figure 3A) and Golgi Grasp65 (Figure 3B),  
191 and consistent with our 3D-SIM data and TEM observations of others (Kondylis et al., 2001;  
192 Rabouille et al., 1999). In both fat body and imaginal discs,  $\gamma$ COP delineated cup-shaped  
193 ERES on their concave sides (Figure 3C). COPI-GTPase Arf1, in contrast, localized to the  
194 membrane complex opposed to the ERES (Figure 3D). Consistent with 3D-SIM again, COPII  
195 protein Sec13 occupied a central position in the ERES concavity in contact with it (Figure  
196 3E), like  $\gamma$ COP. COPII-GTPase Sar1, finally, concentrated in the Golgi in a position more  
197 distal than Sec13 (Figure 3F). In summary, our 3D-SIM and APEX-TEM data show that COPI  
198 and COPII coat proteins and GTPases localize within ERES-Golgi units in different but  
199 nearby locations.

## 200 **Pre-cis-Golgi is involved in both anterograde and retrograde ER-Golgi transport**

201 COPI and COPII coat proteins appear to concentrate in peripheral and central positions of  
202 the ERES cup, respectively. To confirm this complementary distribution, reminiscent of  
203 recent findings in the yeast *Pichia pastoris* (Roy Chowdhury et al., 2020), we examined  
204 ERES-Golgi units in fat body expressing Sec13.GFP and  $\gamma$ COP.RFP simultaneously. This  
205 confirmed that COPII is found at the center of ERES, whereas COPI occupies preferentially  
206 the periphery of the structure (Figure 4A). Given the differential but contiguous  
207 localization of the COPI and COPII coats, suggesting tight coupling of anterograde and  
208 retrograde traffic, we next tried to ascertain whether pre-cis-Golgi was involved in  
209 anterograde or retrograde transport. In a genetic screening we previously conducted, we  
210 had found that Grasp65 was required for efficient general secretion (Ke et al., 2018). As



211 we reported before, Collagen IV.GFP was retained in fat body cells upon Grasp65 knock  
212 down (Figure 4B). This retention occurred in the ER, not in the Golgi, as evidenced by the  
213 orientation of ERES-Golgi units in contact with regions of intracellular Collagen IV  
214 accumulation (Figure 4C). Having established a requirement of Grasp65 in anterograde  
215 ER-Golgi traffic, we next examined its possible role in retrograde Golgi-ER transport. To  
216 do that, we imaged GFP fused to the ER retention motif KDEL, which targets proteins for  
217 retrograde Golgi-ER transport. KDEL.GFP normally localized in the ERES region of ERES-  
218 Golgi units, suggesting efficient recycling of KDEL.GFP from the Golgi back to ERES. Knock  
219 down of Grasp65, in contrast, produced localization of KDEL.GFP in front of ERES,  
220 indicating that KDEL.GFP was not efficiently trafficked from the Golgi to the ER (Figure  
221 4D). These results show that the pre-cis-Golgi is involved in both anterograde and  
222 retrograde transport.

### 223 **FIB-SEM analysis of ERES-Golgi units in fat body and imaginal disc cells**

224 Intrigued by the nature of the ERES/pre-cis-Golgi interface, which our TEM sections could  
225 not clarify, we decided to investigate ERES-Golgi units using FIB-SEM. This technique  
226 allows serial sectioning and electron microscopy imaging of plastic-embedded tissues for  
227 3D reconstruction of subcellular structures with high resolution in the z axis (Narayan and  
228 Subramaniam, 2015). Through FIB-SEM, we imaged volumes of fat body and of wing  
229 imaginal disc tissue with a z resolution of 20 nm (Figure 5A and B, and Suppl. Video 1).  
230 ERES-Golgi units were readily recognizable on the basis of morphology alone. Also  
231 recognizable were contact sites between ER and other organelles (Figure S1). With data  
232 acquired from two samples of each tissue, and using Dragonfly software, we constructed  
233 3D models of 15 fat body and 15 wing disc ERES-Golgi units. (Figure 5C and D, and Suppl.  
234 Video 2). In addition, we reconstructed 15 imaginal disc ERES-Golgi units from one sample  
235 of imaginal wing discs expressing Tango1 (see next Results section and Figure S2). From  
236 the analysis and comparison of the morphological traits of fat body and wing disc ERES-  
237 Golgi units, general characteristics of these structures became apparent. ERES appeared  
238 in concave regions of ribosome-covered ER formed by convergence of fenestrated ER  
239 sheets (Figure 5E and F). In front of these, the Golgi apparatus, despite tremendous  
240 complexity and high tubulation, appeared in all units analyzed as a single, fully continuous  
241 structure (Figure 5C-F). On the trans side of the Golgi, saccular and tubular elements could  
242 be observed, including some identifiable as lysosome-related degradative bodies. Within  
243 each ERES-Golgi unit, ERES proper were usually discontinuous, archipelago-like  
244 collections of ER membrane patches devoid of ribosomes (Figure 5G and H). Between  
245 ERES and Golgi, numerous isolated vesicles could be observed, as well as ERES-Golgi tubes  
246 (Figure 5G and H). We proceeded next to analyze ERES, Golgi and intervening membrane  
247 structures in more detail.



## 248 **Tango1 expression increases ERES size**

249 We performed measurements of ERES and Golgi size on ERES-Golgi units reconstructed  
250 from our FIB-SEM data. ERES, defined as ER regions devoid of ribosomes on their Golgi-  
251 facing side (Figure 6A), were larger in fat body than in wing imaginal disc cells (Figure 6B,  
252 C and F), consistent with our previous observations using SIM (Liu et al., 2017).  
253 Overexpression of Tango1 in the imaginal disc increased the size of this ER region devoid  
254 of ribosomes on one side (Figure 6D and F), indicating an increase in the size of ERES. In  
255 contrast with the difference in ERES size, Golgi size was not significantly different between  
256 fat body and imaginal disc tissues (Figure 6G). Correlation between ERES size and Golgi  
257 size within each ERES-Golgi unit, consistently, was weak (Figure 6H). Golgi morphology,  
258 however, was markedly different between fat body and imaginal discs, as cisternae  
259 stacked in a cis-trans direction were distinguishable in imaginal disc ERES-Golgi units  
260 ( $4.9 \pm 0.6$  cisternal levels,  $n=15$ ) (Figure 6E). In contrast, cisternal stacking was not obvious  
261 in fat body ERES-Golgi units, which displayed a more globular, amorphous morphology.  
262 Consistent with this, the ratio surface/volume was higher in imaginal disc ERES-Golgi units  
263 (Figure 6I). In all, these results, comparing fat body and imaginal discs, suggest that ERES  
264 size can vary across cell types depending on the level of Tango1 expression, while Golgi  
265 size, despite differences in the degree of cisternal organization, varies less.

## 266 **ERES-Golgi vesicles and pearled tubes**

267 Between the Golgi apparatus and the ER, we found numerous vesicles in ERES-Golgi units  
268 of both fat body (Figure 7A) and imaginal disc tissue (Figure 7F). In total, we identified 286  
269 vesicles in ERES-Golgi units of fat body (Figure 7B) and 363 in those of imaginal discs  
270 (Figure 7G). The number of vesicles in each ERES-Golgi unit ranged from 8 to 33 in fat  
271 body (Figure 7C) and from 14 to 47 in imaginal disc tissue (Figure 7H). Besides vesicles,  
272 also visible were omega-shaped buds, emerging from both ERES and Golgi (Figure 7D, E,  
273 I and J). We next analyzed vesicle size and localization within the ERES-Golgi unit of these  
274 vesicles. To do this, we measured the diameter of these vesicles, and found that in both  
275 fat body and imaginal disc tissue the distribution of vesicle sizes showed two peaks at 52  
276 nm and 64 nm (Figure 7B and G), suggesting that these corresponded to two different  
277 populations of vesicles. Furthermore, when the position within ERES-Golgi units of  
278 vesicles was mapped with a cutoff distinguishing vesicles larger and smaller than 58 nm  
279 in diameter, their distribution was reminiscent of the relative COPI center/COPII  
280 periphery distribution observed in our SIM data (Figure 7K and L). In 15 ERES-Golgi units  
281 of imaginal disc cells overexpressing Tango1, finally, we identified 369 vesicles, which  
282 showed a similar two-peaked diameter distribution (Figure S2). In all, our data show that  
283 vesicles are abundant in ERES-Golgi units in *Drosophila*.

284 In addition to vesicles and buds, our FIB-SEM data showed tubular connections between  
285 the ERES and Golgi. Connections spanned distances of about 100 nm between ERES  
286 proper and Golgi and were never tubes with parallel walls, but had in all instances a  
287 pearled shape (Figure 8A and B). In a majority of cases (>80%), their shape was one-  
288 beaded, resembling a vesicle connected to the ERES and Golgi compartments by narrow  
289 necks (Figure 8C). Besides one-beaded tubes, we found some examples of two- and three-  
290 beaded tubes (Figure 8B and C). Instances of two-beaded and three-beaded tubes  
291 extending from ERES without contacting Golgi could be identified as well (Figure 8D and  
292 E). In total, we found at least one connection in each ERES-Golgi unit we reconstructed,  
293 with a maximum of seven in one imaginal disc unit (Figure 8F). Same as buds, tubules  
294 associated in all cases with ERES proper (Figure 8G and H). In summary, our imaging of  
295 ERES-Golgi units found abundant regular-sized vesicles and pearled tubes at the ER-Golgi  
296 interface. In contrast, in none of the 45 ERES-Golgi units analyzed by FIB-SEM we found  
297 evidence of larger megacARRIER vesicles, free tubular elements or saccules capable of  
298 carrying a cargo like collagen from ERES to Golgi.

## 299 DISCUSSION

### 300 Architecture of *Drosophila* ERES-Golgi units

301 We used high resolution imaging techniques, transgenic protein tagging, and chosen loss-  
302 and gain-of-function conditions to characterize *Drosophila* ERES-Golgi units. Importantly,  
303 we used FIB-SEM data to reconstruct the 3D architecture of 45 ERES-Golgi units from fat  
304 body and imaginal disc tissues. Although very heterogeneous in shape, intra- and inter-  
305 tissue comparisons revealed general features. In both fat body and imaginal discs, ERES  
306 are located in concave regions of ER. These are not flat cups, but consist of convergent ER  
307 sheets which are similar to the rest of the fly ER, although more fenestrated and tubulated.  
308 On this ER concavity, a collection of areas devoid of ribosomes conforms the ERES proper.  
309 Tango1 overexpression in imaginal discs increased the size of this ribosome-devoid area,  
310 consistent with a role of Tango1 in defining ERES (Liu et al., 2017; Reynolds et al., 2019;  
311 Rios-Barrera et al., 2017). Golgi lies at a distance of about 100 nm, giving rise together  
312 with ERES to a compact structure, recognizable in both TEM and FIB-SEM samples. It has  
313 been proposed that ERES are phase-separated, membrane-less organelles that behave  
314 like liquid droplets (Gallo et al., 2020; Hanna et al., 2018). Viscosity due to concentration  
315 of traffic regulators between ERES and Golgi must be high, indeed. However, our  
316 characterization shows *Drosophila* ERES-Golgi units as compact membrane assemblages.  
317 While liquid-liquid phase separation may be crucial for aspects of ERES establishment and  
318 function (Maeda et al., 2020; Zhang and Rabouille, 2019), their maintenance may be  
319 better explained by limited diffusion imposed by the enclosing membranes and classical  
320 tethering of those membranes by proteins like Tango1, Grasp65, golgins and Rab1. Indeed,  
321 in plants, there is evidence of physically solid attachment between ERES and Golgi  
322 (Sparkes et al., 2009).

323 Despite its amorphous appearance and weak cisternal organization, the markers we  
324 studied indicate that the Golgi is regionalized into cis-, mid- and trans- elements.  
325 Additionally, markers characteristic of cis-Golgi could be resolved in two locations defined  
326 by GMAP (cis-Golgi) and Grasp65/GM130 (pre-cis-Golgi). FIB-SEM reconstructions,  
327 nonetheless, invariably showed the Golgi as a single continuous structure. Therefore, the  
328 pre-cis-Golgi region is not a separate cisterna or tubular cluster, but an integral part of  
329 the Golgi apparatus. We conclude, thus, that an intermediate compartment between  
330 ERES and Golgi does not exist in *Drosophila* as a separate entity. Furthermore, our  
331 characterization of Grasp65 loss shows that the pre-cis-Golgi region where it localizes is  
332 involved in both anterograde and retrograde transport. This, together with the fact that  
333 Grasp65 and GM130 are found in vertebrate ERGIC (Marra et al., 2001), suggests that the  
334 ERGIC is not just functionally equivalent, but also evolutionarily homologous to the fly

335 pre-cis-Golgi. This comparative view would support a status for the ERGIC as a structural  
336 constituent of the Golgi rather than a transient collection of carriers, placing the actual  
337 ER-Golgi interface directly in front of vertebrate ERES, as in other eukaryotes. Consistent  
338 with this, a recent study in human cells found that during ER-Golgi transport COPII  
339 components remain in the vicinity of ERES, cargo traveling from there in COPII-uncoated,  
340 Rab1-dependent carriers (Westrate et al., 2020).

341 Unlike ERES, which were larger in fat body cells and increased in size with Tango1  
342 overexpression, Golgi size was not significantly different across samples and only weakly  
343 correlated with ERES size, suggesting that partially autonomous organizing mechanisms  
344 act in ERES and Golgi despite their intimate relation. A difference was patent however in  
345 Golgi morphology, as cisternal organization was more distinct in disc cells than in fat body.  
346 In mammalian cells, increased secretory load is known to enlarge ERES on one hand  
347 (Farhan et al., 2008), and induce higher cisternal connectivity on the other (Trucco et al.,  
348 2004). Fat body adipocytes are highly secretory cells producing not just Collagen IV and  
349 other extracellular matrix proteins, but also large amounts of serum proteins, clotting  
350 factors and antibacterial peptides. Differential secretory activity, therefore, may underlie  
351 morphological divergence between fat body and imaginal disc ERES-Golgi units.  
352 *Drosophila*, hence, could be an excellent model for future studies of self-organizational  
353 properties, physiological adaptation and scaling relations across the ER-Golgi interface  
354 with the help of recently developed inducible cargos (Casler et al., 2020).

355 While in the budding yeast *Saccharomyces cerevisiae* anterograde ER-Golgi and  
356 retrograde Golgi-ER transport seem to take place in different ER regions (Schröter et al.,  
357 2016), in the fission yeast *Pichia pastoris* they are tightly coupled at ERES, with COPII and  
358 COPI displaying a center/periphery relative distribution when visualized at high resolution  
359 (Roy Chowdhury et al., 2020). Our *Drosophila* data show now the same COPII-  
360 center/COPI-periphery relation in an animal. Broad colocalization of SEC16 with Tip20  
361 homologue RINT1 in U2OS cells suggested closeness between ERES and ERAS as well in  
362 human cells (Roy Chowdhury et al., 2020). It would be interesting to know next whether  
363 in vertebrates this relative center/periphery relation is conserved at the same fine scale  
364 and how this relates to the existence of the ERGIC.

### 365 **Membrane structures mediating ER-Golgi transport**

366 In our FIB-SEM data, abundant vesicles can be observed between ERES and Golgi in all 45  
367 ERES-Golgi units we modeled. In many instances, presence of a coat in vesicles and buds  
368 is discernible from the darker signal outlining them. The resolution of our imaging,  
369 however, does not allow determination of the type of coat for each vesicle. Nonetheless,  
370 the distribution of vesicle sizes, with two peaks around 52 and 64 nm in diameter,

371 suggests the presence of two different populations, which might correspond to COPI and  
372 COPII vesicles, respectively. Consistent with this would be also the spatial arrangement of  
373 the vesicles, correlating with the COPII-center/COPI-periphery distribution observed with  
374 SIM and APEX-TEM. In addition to vesicles, we observed tubular connections between  
375 Golgi and ERES. These were not straight tubes, but beaded tubulations, the majority of  
376 them consisting of a single vesicle-sized bead, suggesting that vesicle budding  
377 machineries must be involved in their formation. The simplest explanation for this kind  
378 structure would be a budding vesicle meeting the opposite compartment before excision.  
379 However, the few two-beaded and three-beaded tubes we observed are difficult to  
380 explain through this mechanism. Multibudded tubules have been observed protruding  
381 from ERES in cultured human cells (Bannykh et al., 1996) and their formation can be  
382 induced by COPII on liposomes (Bacia et al., 2011). Alternatively, buds from Golgi and  
383 ERES could meet to form a tube. Because our study is not dynamic, we have no insight  
384 into the duration of connections. However, it is worth noting that their prolonged  
385 maintenance should result in bidirectional flow, difficult to reconcile with transport  
386 directionality. If, on the contrary, the tubes are short-lived intermediates preceding  
387 excision from the donor compartment, directional transport may still be achieved  
388 (Mironov and Beznoussenko, 2019).

389 Tubular elements have been associated with all steps of secretion (Martínez-Menárguez,  
390 2013; Mironov et al., 2003; Polishchuk et al., 2009; Robinson et al., 2015; Simpson et al.,  
391 2006). Our data suggests that vesicles, because of their large numbers, are the  
392 predominant form of ER-Golgi exchange. Nonetheless, our results may have important  
393 implications for the transport of collagen and other cargos that cannot fit into these  
394 vesicles. Collagen-specific factors creating enlarged carriers have been postulated. Our  
395 data in *Drosophila*, documenting 1018 vesicles and 133 ER-Golgi tubes, found no evidence  
396 for megavesicles. This is despite the fact that we analyzed fat body, a cell type producing  
397 Collagen IV, the major collagen in flies. We therefore conclude that, absent megavesicles,  
398 tubular continuities are the only option left capable of transporting such proteins. We  
399 also observed tubular continuities in ERES of imaginal discs, which do not produce  
400 collagen, indicating that these are not specific of collagen-secreting cells. We can  
401 speculate that in vertebrates, where Golgi and ERES are distant, an evolutionary  
402 parsimonious translation of our findings would support that tubular connections between  
403 ERES and ERGIC, rather than megavesicles, mediate ER export of large proteins (Malhotra  
404 and Erlmann, 2015; McCaughey et al., 2019). If true, reports of larger vesicles transporting  
405 collagen to the Golgi, if not artefactual (Omari et al., 2020), could correspond to COPII-  
406 uncoated ERGIC membranes (Westrate et al., 2020).

407 **MATERIALS AND METHODS**

408 ***Drosophila* strains**

409 Standard fly husbandry techniques and genetic methodologies, including balancers and dominant  
410 markers, were used to assess segregation of transgenes in the progeny of crosses, construct  
411 intermediate lines and obtain flies of the required genotypes for each experiment (Roote and  
412 Prokop, 2013). Flies were cultured at 25°C in all experiments. The GAL4-UAS binary expression  
413 system (Brand and Perrimon, 1993) was used to drive expression of UAS transgenes under  
414 temporal and spatial control of transgenic GAL4 drivers *Cg-GAL4* (fat body), *BM-40-SPARC-GAL4*  
415 (fat body) and *Act5C-FO-GAL4* (imaginal discs). Stable insertion of transgenic UAS constructs was  
416 achieved through standard P-element transposon transgenesis (Rubin and Spradling,  
417 1982). Detailed genotypes in each experiment are provided in [Table S1](#). The following strains were  
418 used:

419 *w*<sup>1118</sup> (used as wild type; Bloomington Drosophila Stock Center, 3605)

420 *w*; *Cg-GAL4* (Bloomington Drosophila Stock Center, 7011)

421 *y w*; *Act5C-FO-GAL4 / TM6B, Tb* (Bloomington Drosophila Stock Center, 3954)

422 *y w*; *Sec16.sGFP*<sup>fTRG.1259</sup> (Vienna Drosophila Resource Center, 318329)

423 *w Gmap*<sup>KM0132</sup>.*GFP* (Kyoto Drosophila Genomics and Genetics Resources, 109702)

424 *w*; *UAS-GalT.TagRFP; TM2 / TM6B, Tb* (Bloomington Drosophila Stock Center, 65251)

425 *w*; *UAS-ManII.EGFP ; TM2 / TM6B, Tb* (Bloomington Drosophila Stock Center, 65248)

426 *w*; *UAS-ManII.TagRFP* (Bloomington Drosophila Stock Center, 65249)

427 *w*; *UAS-Grasp65.GFP* (Bloomington Drosophila Stock Center, 8507)

428 *w*; *UAS-Grasp65.RFP* (this study)

429 *y w*; *Kr<sup>lf-1</sup> / CyO ; UAS-γCOP.mRFP* (Bloomington Drosophila Stock Center, 29714)

430 *w*; *UAS-γCOP.APEX.GFP* (this study)

431 *w*; *UAS-Arf79F.GFP.APEX* (this study)

432 *w*; *UAS-Sec13.GFP.APEX* (this study)

433 *w*; *UAS-Sar1.GFP.APEX* (this study)

434 *w*; *UAS- SP.GFP.Tango1* (Liu et al., 2017).

435 *w*; *UAS-SP.GFP.APEX.Tango1* (this study)

436 *w*; *UAS-Grasp65.GFP.APEX* (this study)

437 *y sc v sev ; UAS-Grasp65*<sup>HMC05584</sup>.*RNAi* (Bloomington Drosophila Stock Center, 64565)



438 *w ; vkg<sup>G454</sup>.GFP / CyO ; BM-40-SPARC-GAL4 UAS-Dcr2 / TM6B* (Zang et al., 2015)

439 *w ; UAS.GFP.KDEL* (Bloomington Drosophila Stock Center, 30906)

440 **UAS-Sec13.GFP.APEX, UAS-Sar1.GFP.APEX, UAS-Arf1.GFP.APEX and UAS-Grasp65.GFP.APEX**

441 Gateway destination vector pTGW (UAS-GFP-Gateway cassette, Drosophila Carnegie Vector  
442 collection) was modified into pTWGA (UAS-Gateway cassette-GFP-APEX). For that, the APEX  
443 sequence was PCR-amplified from plasmid pcDNA3 APEX2-NES (Addgene, cat # 49386) with  
444 primers attNheIAPEX-F and attSpeIAPEX-R adding att sites. The resulting fragment was purified  
445 through gel extraction (Magen HiPure Gel Pure DNA Mini kit, cat # D2111-03,) and cloned into  
446 vector pDONR221 (Thermo Fisher Scientific, cat # 12536017) with Gateway™ BP Clonase™ II  
447 Enzyme Mix (Thermo Fisher Scientific, cat # 11789020) to produce a pDONR221-APEX entry clone.  
448 From there, the APEX sequence was recombined into pTGW through Gateway LR recombination  
449 using LR Clonase™ II Plus enzyme (Thermo Fisher Scientific, cat # 12538120) to obtain pTGA.  
450 Because this vector now lacked a Gateway recombination cassette, the cassette was added back  
451 to pTGA using an XbaI restriction site at the 5' of GFP. To do this, first, the Gateway cassette  
452 sequence was PCR-amplified from pTGW with primers sooXbaIGate-F and sooXbaIGate-R adding  
453 XbaI restriction sites and soo sites. Gel purified PCR product soo-XbaI-Gateway-XbaI-soo was then  
454 cloned into pTGA linearized by XbaI digestion (New England Biolabs, cat#R0145S) using SoSoo mix  
455 reagent (Trelief™ SoSoo Cloning Kit, TSINGKE, cat # TSV-S1) to generate vector pTWGA.

456 To produce each individual APEX.GFP construct, the coding sequence of each gene was amplified  
457 from whole larva cDNA using PrimeScript RT-PCR Kit (Takara, cat # RR014-A). The resulting  
458 products were recombined into pDONR221 and transferred to the pTWGA vector to finally  
459 produced the desired plasmids. Primers were: attSec13-F, attSec13-R; attGrasp65-F, attGrasp65-  
460 R; attSar1-F, attSar1-R; attArf79F-F, attArf79F-R.

461 **UAS-SP.GFP.APEX.Tango1**

462 The Gateway cassette sequence was added to pT-SP-G (Liu et al., 2017) to obtain pTSGW (UAS-  
463 Signal peptide of Tango1-GFP-Gateway cassette). For that, the cassette sequence was amplified  
464 from pTGW with primers Spelgate-F and Xholgate-R', adding Spel and XhoI restriction sites and  
465 the resulting fragment was inserted into pT-SP-G through Spel and XhoI double enzyme digestion  
466 and T4 ligation, producing pTSGW destination vector, into which APEX.Tango1 sequence from  
467 pDONR221-APEX.Tango1 was later transferred through Gateway LR recombination.

468 To obtain pDONR221-APEX.Tango1, the GFP sequence in pT-SP-G-Tango1 (Liu et al., 2017) was  
469 removed through NheI (New England Biolabs, cat # R3131L) and Spel (New England Biolabs, cat #  
470 R3133L) restriction. In its place, we introduced the APEX sequence, PCR-amplified from pcDNA3  
471 APEX2-NES with primers NheIAPEX-F' and SpelAPEX-R, which added NheI and Spel restriction sites  
472 for subsequent double enzyme digestion and ligation with T4 DNA ligase (New England Biolabs,  
473 cat # M0202L) to obtain pTSA-Tango1. From pTSA-Tango1, the APEX.Tango1 sequence was  
474 amplified with primers attAPEXTango1-F and attAPEXTango1-R, adding att sites. The resulting att-



475 flanked APEX.Tango1 fragment was cloned into pDONR221 through Gateway BP recombination  
476 to obtain pDONR221-APEX.Tango1 entry clone.

#### 477 **UAS- $\gamma$ COP.APEX.GFP**

478 The coding sequence of  $\gamma$ COP was obtained by RT-PCR from whole larva cDNA with primers  $\gamma$ COP-  
479 F and  $\gamma$ COP-APEX-R. The APEX sequence was PCR-amplified from pcDNA3 APEX2-NES with primers  
480  $\gamma$ COP-APEX-F and APEX-R. Overlap PCR was used to link  $\gamma$ COP and APEX sequences into  $\gamma$ COP.APEX.  
481  $\gamma$ COP.APEX was then PCR-amplified with primers att $\gamma$ COP-F and attAPEX-R adding att sites and  
482 cloned into pDONR221 through Gateway BP recombination to obtain pDONR221- $\gamma$ COP.APEX.  
483 From there, the  $\gamma$ COP.APEX sequence was transferred into pTWG (UAS-Gateway cassette-GFP,  
484 Drosophila Carnegie Vector collection) through Gateway LR recombination.

#### 485 **UAS-Grasp65.RFP**

486 Grasp65 was amplified with primers adding att sites as above, recombined into plasmid  
487 pDONR221 using Gateway BP recombination to obtain pDONR221-Grasp65, and from there  
488 transferred to pTWR (UAS-Gateway cassette-RFP, Drosophila Carnegie Vector collection) using  
489 Gateway LR recombination.

#### 490 **SIM and confocal imaging**

491 Tissue samples were pre-dissected in PBS by turning them inside out with fine tip forceps, fixed in  
492 PBS containing 4% PFA (paraformaldehyde, Sinopharm Chemical Reagent, cat # 80096692),  
493 washed in PBS (3  $\times$  10 min), dissected from the carcass and mounted on a glass slide with a drop  
494 of DAPI-Vectashield (Vector Laboratories, cat # H-1200). SIM image stacks (z-steps of 0.24  $\mu$ m)  
495 were acquired with a Nikon A1 N-SIM STORM microscope equipped with a CFI Apo SR TIRF 100 $\times$   
496 oil (NA 1.49) objective and an Andor Technology EMCCD camera (iXON DU-897 X-9255). Laser  
497 lines at 488, 561 and 640 nm were used for excitation. SIM image reconstructions were performed  
498 with NIS-Elements software (Nikon). Images are maximum intensity projections of two to five  
499 confocal sections. Confocal images of *Grasp65*<sup>1</sup> fat body (Figure 4C) were acquired in a ZEISS  
500 LSM780 microscope equipped with a 100 $\times$  oil Plan-Apochromat objective (NA 1.4).

#### 501 **Immunohistochemistry**

502 The following primary antibodies were used: Guinea pig anti-Tango1 (1:1,000) (Lerner et al., 2013),  
503 rabbit anti-GM130 (1:500, Abcam, cat # ab30637) and goat anti-Gmap (1:500) (Riedel et al., 2016).  
504 Secondary antibodies were Goat Anti-Guinea Pig IgG (Rhodamine conjugated, Jackson  
505 ImmunoResearch, cat # 106025003; Alexa Fluor 647 conjugated, Jackson ImmunoResearch, cat #  
506 106605003), Alexa Fluor 555 Donkey Anti-Rabbit IgG (Invitrogen, cat # 1945911) and Alexa Fluor  
507 555 Donkey Anti-Goat IgG (Abcam, cat # ab150130) respectively. Antibody stainings were  
508 performed using standard procedures for larval tissues. Briefly, larvae were pre-dissected in PBS,  
509 fixed in PBS containing 4% PFA (paraformaldehyde, Sinopharm Chemical Reagent, cat # 80096692),  
510 washed in PBS (3  $\times$  10 min), blocked in PBT-BSA [PBS containing 0.1% Triton X-100 detergent  
511 (Sigma-Aldrich, cat # T8787), 1% BSA (Zhongkekeao, cat # 201903A28), and 250 mM NaCl

512 (Amresco, cat # 0805C384)], incubated overnight with primary antibody in PBT-BSA in 4°C, washed  
513 in PBT-BSA (3 × 20 min), incubated for 2 h with secondary antibody in PBT-BSA at RT, washed in  
514 PBT-BSA (3 × 20 min) and PBS (3 × 10 min). Tissues were finally dissected and mounted on a glass  
515 slide with a DAPI-Vectashield (Vector Laboratories, cat # H-1200).

#### 516 **APEX-TEM**

517 Third instar larvae were pre-dissected by turning them inside out with fine tip forceps in fixation  
518 solution containing 2.5% glutaraldehyde (TED PELLA, cat # 18426), 2% paraformaldehyde (Alfa  
519 Aesar, cat # 43368) and 0.1 M PB (Na<sub>2</sub>HPO<sub>4</sub> (Alfa Aesar, cat # A11817), NaH<sub>2</sub>PO<sub>4</sub> (Amresco, cat #  
520 0571-500G), pH 7.2). Prefixation was conducted at RT for 2h in the same solution. After this,  
521 pre-dissected larvae were washed in 0.1 M PB (3 X 7 min, RT). During the last wash, 30% H<sub>2</sub>O<sub>2</sub>  
522 (Guoyao, cat # 10011218) was quickly mixed in DAB solution to a 0.03% v/v concentration. To  
523 prepare the DAB solution, DAB (3,3'-Diaminobenzidine, Sigma, cat # D56637-1G) was freshly  
524 dissolved in 0.1 M PB (pH 7.2) to a 0.5 mg/ml concentration and kept at 4°C avoiding light. The  
525 larval carcasses were incubated in the H<sub>2</sub>O<sub>2</sub>/DAB mixture on a glass depression well at 4°C for 5-  
526 10 min, gently shaking in the dark. After this, the carcasses were transferred to 0.1 M PB and post-  
527 fixed in a mixture of 1% osmic acid (Tedpellco, cat # 018456) and potassium ferrocyanide (1.5%  
528 w/v, Sigma, cat # 60299-100G-F) at RT avoiding light. Postfixation times were 30 min for fat body  
529 30 min and 20 min for imaginal disc tissues. Samples were then washed with MiliQ H<sub>2</sub>O (5 X 7 min,  
530 RT), incubated with 1% uranyl acetate (Merck, cat # 8473) in dark at RT for 1 h or overnight at 4°C,  
531 washed with MiliQ H<sub>2</sub>O (5 X 7 min, RT), and dehydrated in a series of 5 min washes on ice with  
532 prechilled 30%, 50%, 70%, 90% and 100% (twice) ethanol (Tongguang Jingxi Huagong, cat #  
533 104021), acetone/ethanol (1:1) and 100% acetone (Tongguang Jingxi Huagong, cat # 105003).  
534 Infiltration was conducted at RT with a mixture of acetone and resin 1:1 for 1.5 h, 1:2 for 3 h and  
535 1:3 overnight. The next day, carcasses were immersed in resin (3 X 3 h and then overnight, RT)  
536 consisting of v/v 48% SPI-PON 812 (Epoxy Resin Monomer, SPI-CHEM, cat # 02659-AB), 16% DDSA  
537 (Dodecenyl Succinic Anhydride, SPI-CHEM, cat # 02827-AF), 34% NMA (Nadic Methyl Anhydride,  
538 SPI-CHEM, cat # 02828-AF) and 2% BDMA (N,N-Dimethylbenzylamine, SPI-CHEM, cat # 02821-CA).  
539 The desired tissues were then dissected from the carcasses and placed in block molds filled with  
540 resin for hardening at 60°C during 48 h. 70 nm ultrathin section from the hardened blocks were  
541 cut on a Leica EM UC7 ultramicrotome using an Ultra 45° diamond knife (DiATOME, Knives No #  
542 MS17502) and imaged in a Hitachi H-7650B electron microscope.

#### 543 **FIB-SEM**

544 Resin blocks containing embedded sample tissues were obtained as above. Blocks were trimmed  
545 to expose tissues, adhered to a 45/90° screw type holder (φ12.7 mm\*22.8 mm, Zhongxingbairui,  
546 ZB-Y1811), and coated with Gold using a HITACHI E-1010 ion sputter coater for 120 s. FIB-SEM  
547 imaging was performed in a FEI Helios NanoLab G3 dual beam microscope system equipped with  
548 ETD, TLC, and ICD cameras (ThermoFisher Scientific). A 0.6 μm protective Pt coat was applied to  
549 the region of interest through gas injection prior to FIB milling and SEM imaging. For milling slices,  
550 an ion beam current of 0.43 nA at 30 kV acceleration voltage was used for milling slices at a step  
551 size of 20 nm. The parameters for SEM imaging were: 0.4 nA beam current, 2 kV acceleration

552 voltage, 2 mm working distance, 8  $\mu$ s dwell time, 4 nm pixel size and 4096 X 3536 pixel count. TLD  
553 and ICD cameras collected backscattered signal for imaging. The imaging software was AutoSlice  
554 and View G3 1.7.2 (FEI).

555 Images acquired by FIB-SEM were imported into Dragonfly (Object Research Systems) using  
556 Dragonfly Image Loader and aligned through the SSD method in the Slide Registration panel. For  
557 segmentation, different ROIs were created in the ROI tools panel. Each organelle or membrane  
558 element was manually segmented as an individual ROI with the ROI Painter round brush tool in  
559 2D mode. After segmentation in sections, ROIs were exported and saved as object files. Objects  
560 were then converted into 3D meshes using the export box in the ROI Tools panel to create meshes.  
561 Meshes were smoothed 4-6 times and observed in 3D scene mode as solid, fully opaque objects.  
562 Observing angles were adjusted manually or set with the flip/rotate tools in the main panel. For  
563 volume and surface measurements, values for each object were read in the information panel  
564 and recorded. The diameter of each vesicle, visible in 2-4 continuous sections, was measured on  
565 its largest xy section in 2D mode by using the Ruler tool in the annotation panel. Movie Maker  
566 tools within Dragonfly were used to create movies of rotating ERES-Golgi units.

#### 567 **Statistical analysis**

568 Statistical analysis and graphical representations were performed using GraphPad Prism.  
569 Unpaired two-tailed t tests were performed to test significance of differences in ERES and Golgi  
570 volume, and proportion of vesicle classes among ERES-Golgi units of different tissues. Linear  
571 regression was performed to test correlation between Golgi surface and volume, as well as ERES  
572 and Golgi volume. Vesicle diameter frequency distributions were fit to a sum of Lorentzians curve.

573 **CONFLICT OF INTEREST**

574 We are not aware of any commercial or financial relationships that could be construed as a  
575 potential conflict of interest.

576 **ACKNOWLEDGEMENTS**

577 We wish to thank Manfred Auer for initial suggestions on Dragonfly use. We also thank Ying Liu  
578 and the Tsinghua Center for Protein Research and Technology (Ying Li and Xiaomin Li) for technical  
579 help. This work was funded by grants 91854207, 31771600, 31750410689 and 31550110204 (to  
580 J.C.P.-P) and 31701248 (to M.L.) from the Natural Science Foundation of China.

581 FIGURES

582 Figure 1. *Drosophila* ERES-Golgi units contain trans-, mid-, cis- and pre-cis-Golgi  
583 elements

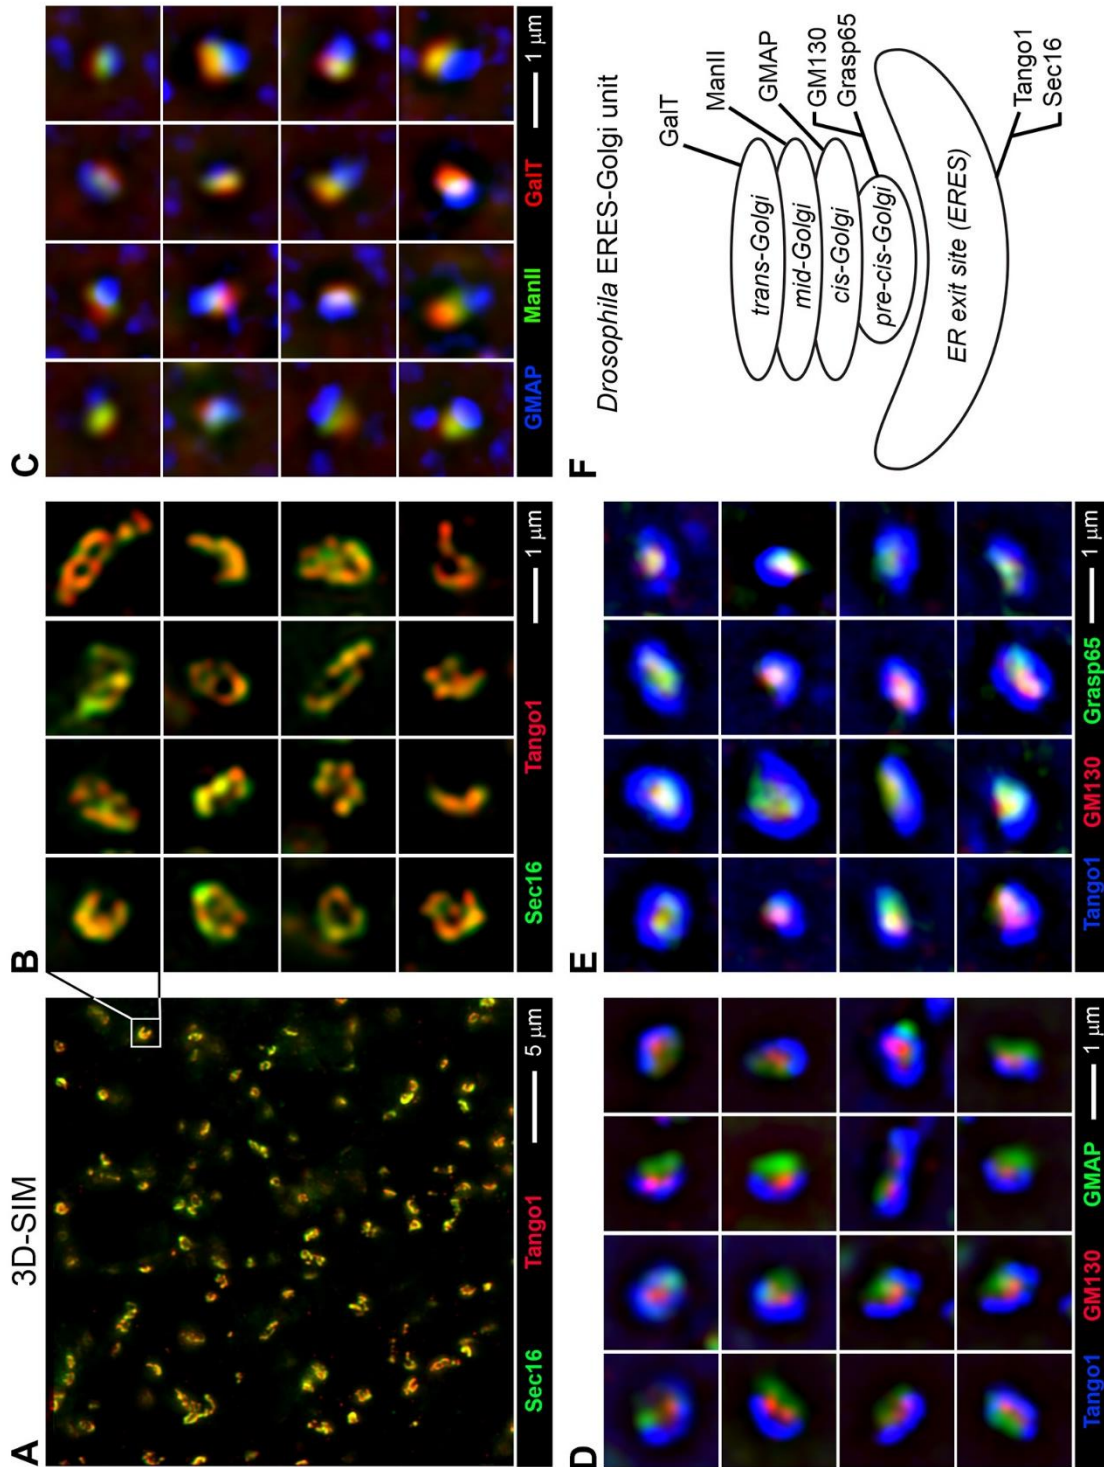

584 **Figure 1. *Drosophila* ERES-Golgi units contain trans-, mid-, cis- and pre-cis-Golgi**  
585 **elements**

586 (A) Super-resolution SIM (Structured Illumination Microscopy) image of third instar larval  
587 fat body showing ERES markers Sec16 (*Sec16.sGFP*, green) and Tango1 (antibody staining,  
588 red).

589 (B) Magnified view of individual ERES in (A).

590 (C) SIM images of Golgi markers GMAP (antibody staining, blue), ManII (*Cg>ManII.EGFP*,  
591 green) and GalT (*Cg>GalT.TagRFP*, red) in fat body.

592 (D) SIM images of ERES marker Tango1 (antibody staining, blue) and Golgi markers GMAP  
593 (*Gmap.GFP*, green) and GM130 (antibody staining, red) in fat body.

594 (E) SIM images of ERES marker Tango1 (antibody staining, blue) and Golgi markers  
595 Grasp65 (*Cg>Grasp65.GFP*) and GM130 (antibody staining, red) in fat body.

596 (F) Schematic illustration of an ERES-Golgi unit depicting relative localization of ERES and  
597 Golgi markers. Besides cis-, mid- and trans-Golgi, a fourth pre-cis-Golgi element can be  
598 distinguished.



599 **Figure 2. COPI and COPII distribution in ERES-Golgi units imaged through SIM**

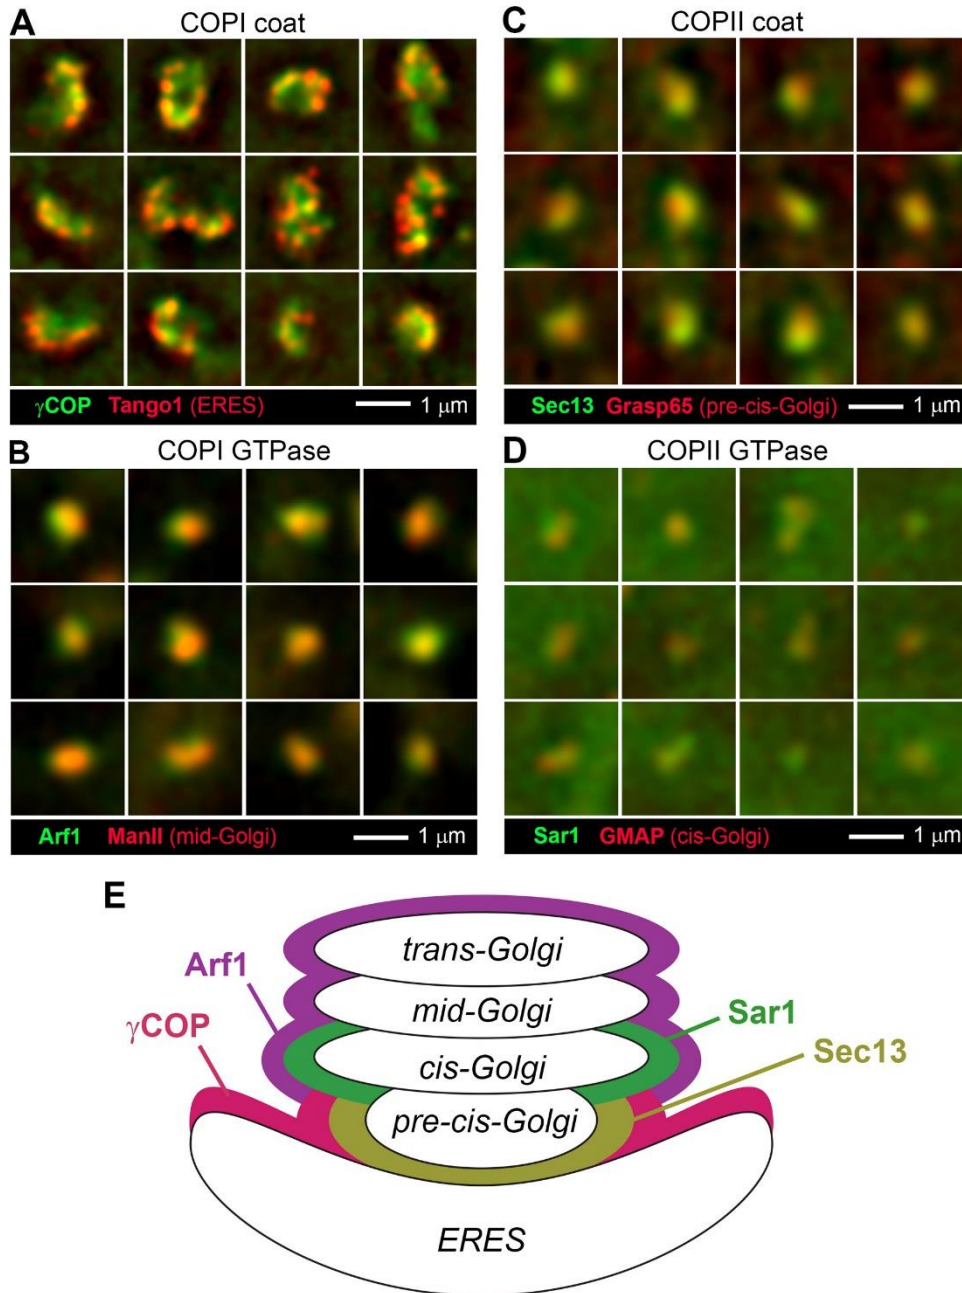



600 **Figure 2. COPI and COPII distribution in ERES-Golgi units imaged through SIM**

601 (A) SIM images showing localization of  $\gamma$ COP (*Cg> $\gamma$ COP.APEX.GFP*, green) and ERES marker  
602 Tango1 (antibody staining, red) in fat body.

603 (B) SIM images showing localization of Arf1 (*Cg>Arf79F.GFP.APEX*, green) and mid-Golgi  
604 marker ManII (*Cg>ManII.TagRFP*, red) and ERES marker Tango1 (antibody staining, red)  
605 in fat body.

606 (C) SIM images showing localization of Sec13 (*Cg>Sec13.GFP.APEX*, green) and pre-cis-  
607 Golgi marker Grasp65 (*Cg>Grasp65.RFP*, red) in fat body.

608 (D) SIM images showing localization of Sar1 (*Cg>Sar1.GFP.APEX*, green) and cis-Golgi  
609 marker GMAP (antibody staining, red) in fat body.

610 (E) Schematic illustration of an ERES-Golgi unit depicting concentration in different  
611 regions of COPI and COPII proteins.

612 **Figure 3. COPI and COPII distribution imaged through APEX-TEM**

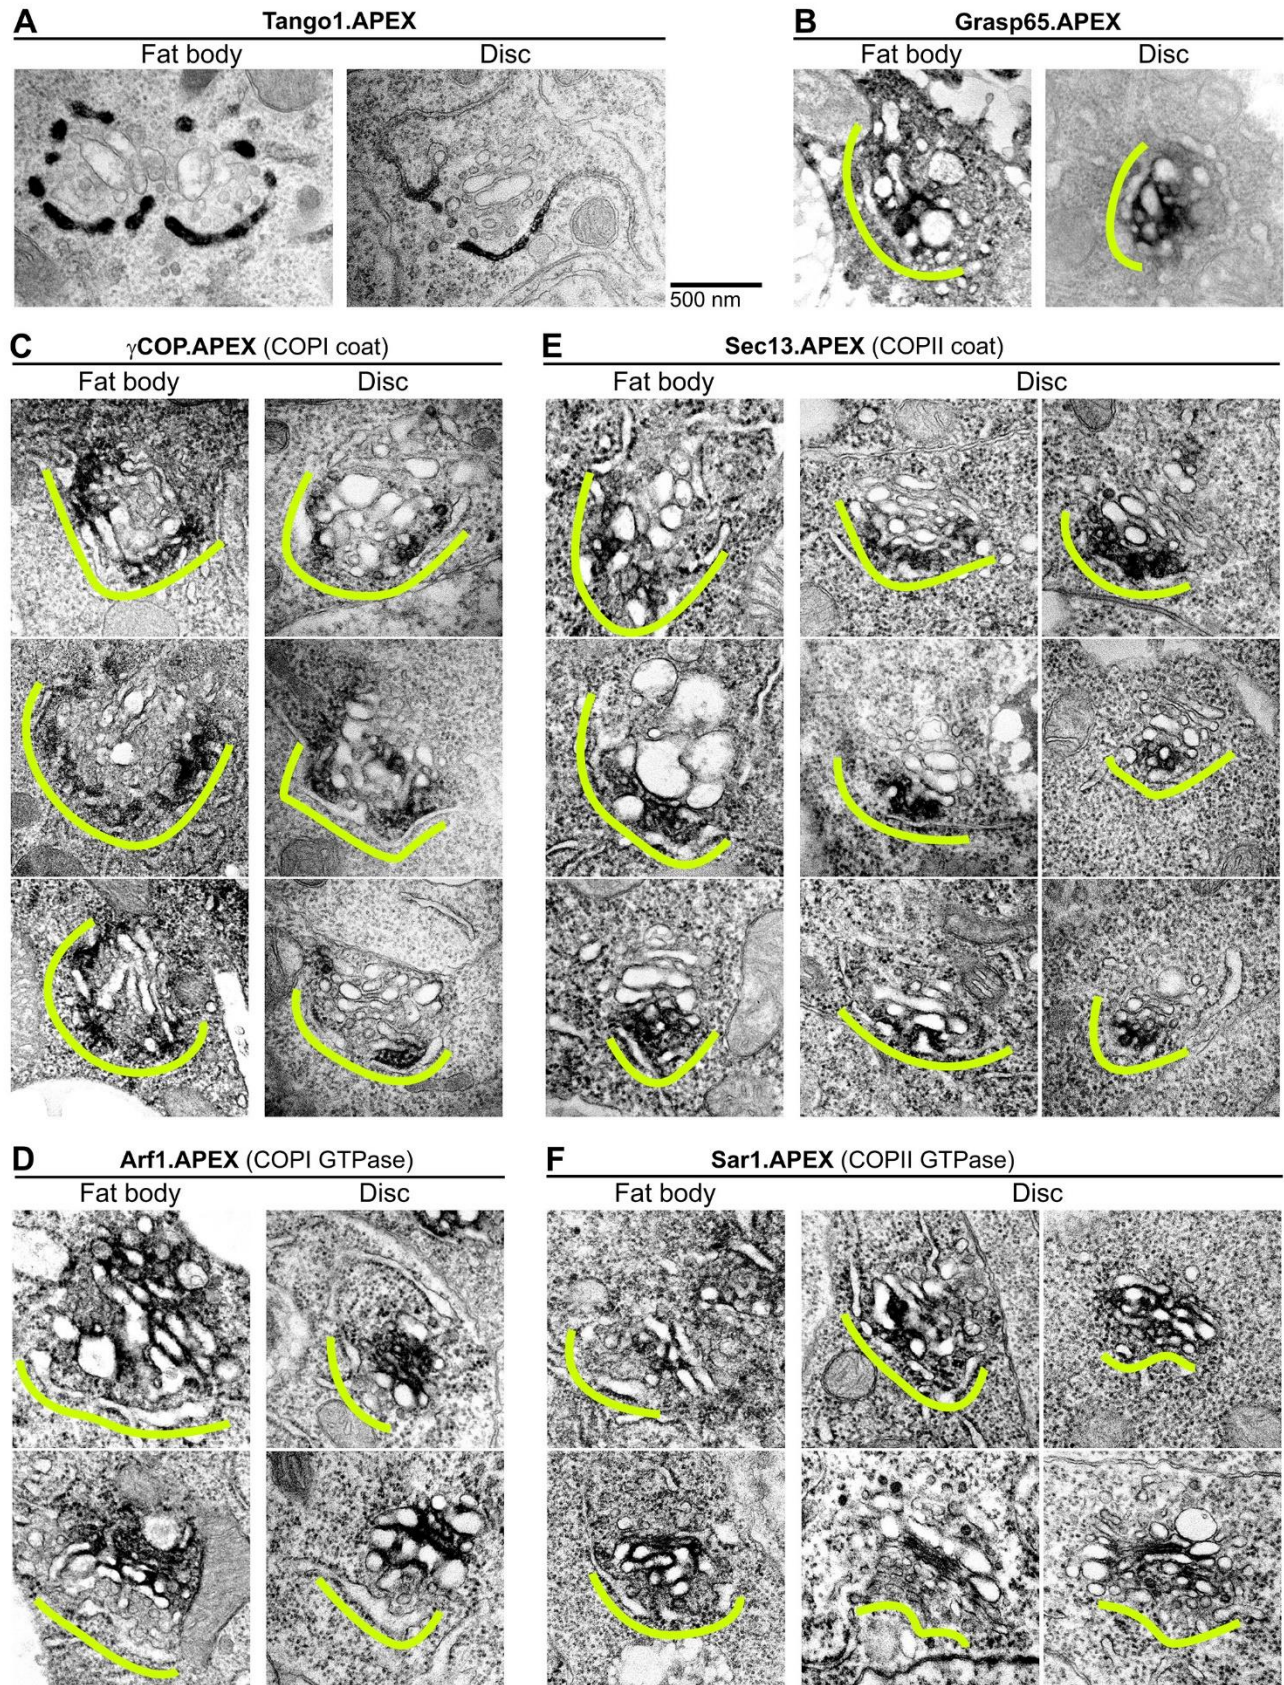



613 **Figure 3. COPI and COPII distribution imaged through APEX-TEM**

614 Transmission electron micrographs from fat body or imaginal disc tissue, as indicated,  
615 showing localization within ERES-Golgi units of (A) ERES marker Tango1  
616 (*SP.GFP.APEX.Tango1*), (B) pre-cis-Golgi marker Grasp65 (*Grasp65.GFP.APEX*), (C) COPI  
617 coat protein  $\gamma$ COP ( *$\gamma$ COP.APEX.GFP*), (D) COPI GTPase Arf1 (*Arf79F.GFP.APEX*), (E) COPII  
618 coat protein Sec13 and (*Sec13.GFP.APEX*), and (F) COPII GTPase Sar1 (*Sar1.GFP.APEX*).  
619 Expression of transgenic APEX-tagged proteins was driven by *Act-GAL4* in imaginal discs  
620 and by *Cg-GAL4* in fat body. Dark deposits after DAB reaction reveal concentration of  
621 APEX-tagged proteins. Yellow lines outline the ERES concavity. All APEX signals are  
622 cytoplasmic except for Tango1, tagged in its ER luminal domain.

623

Figure 4. Pre-cis-Golgi is involved in both anterograde and retrograde transport

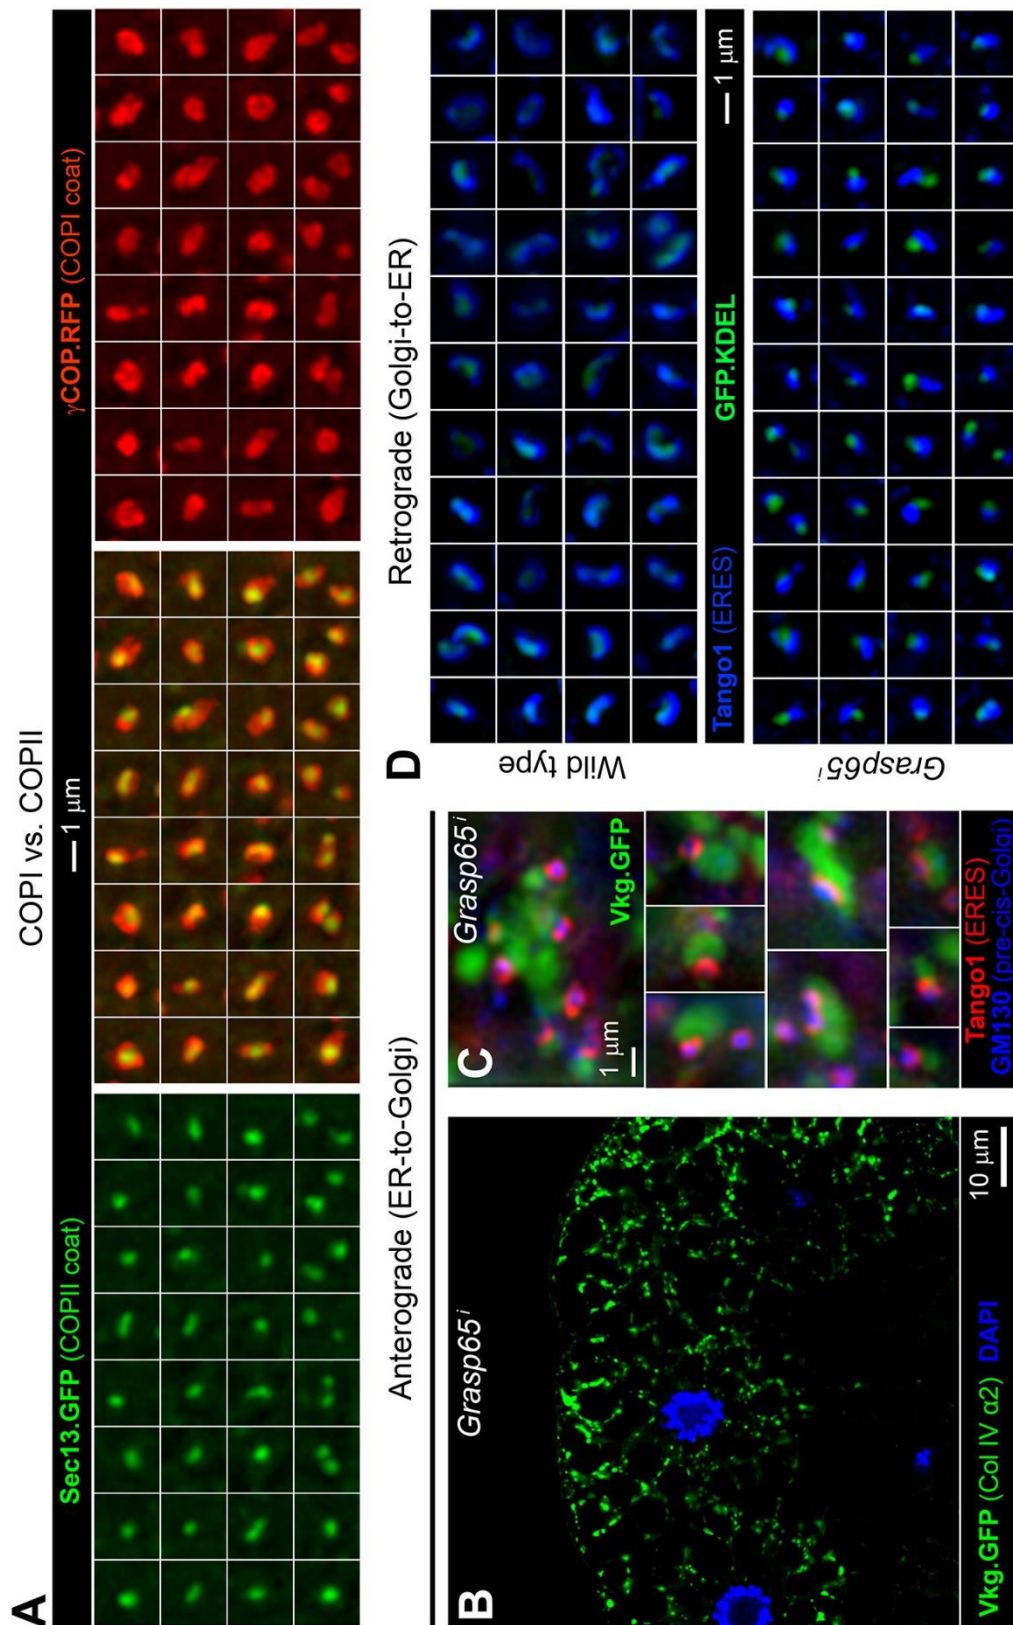

624 **Figure 4. Pre-cis-Golgi is involved in both anterograde and retrograde transport**

625 (A) SIM images of fat body ERES showing localization of COPII coat protein Sec13  
626 (*Cg>Sec13.GFP.APEX*, left panels, green) and COPI coat protein  $\gamma$ COP (*Cg> $\gamma$ COP.mRFP*,  
627 right panels, red) in a complementary center/periphery distribution (center panels, green  
628 and red merged).

629 (B) Confocal image of fat body cells showing intracellular retention of Collagen IV  
630 (*vkg.GFP*, green) upon Grasp65 knock down (*Cg>Grasp65<sup>i</sup>*). Nuclei stained with DAPI  
631 (blue).

632 (C) SIM images of Collagen IV (*vkg.GFP*, green) retained inside fat body cells upon Grasp65  
633 knock down (*Cg>Grasp65<sup>i</sup>*). The tissue has been stained with anti-Tango1 (ERES, red) and  
634 anti-GM130 (Golgi, blue). The orientation of ERES-Golgi units with respect to retained  
635 collagen indicates ER retention.

636 (D) SIM images of retrograde cargo GFP.KDEL (*Cg>GFP.KDEL*, green) distribution in  
637 relation to ERES (anti-Tango1, blue) in wild type (top) and *Cg>Grasp65<sup>i</sup>* (bottom) fat body.  
638 Accumulation of GFP.KDEL in front of ERES upon Grasp65 knock down indicates Golgi  
639 retention.

640 **Figure 5. FIB-SEM analysis reveals a single continuous Golgi compartment per ERES-**  
641 **Golgi unit**

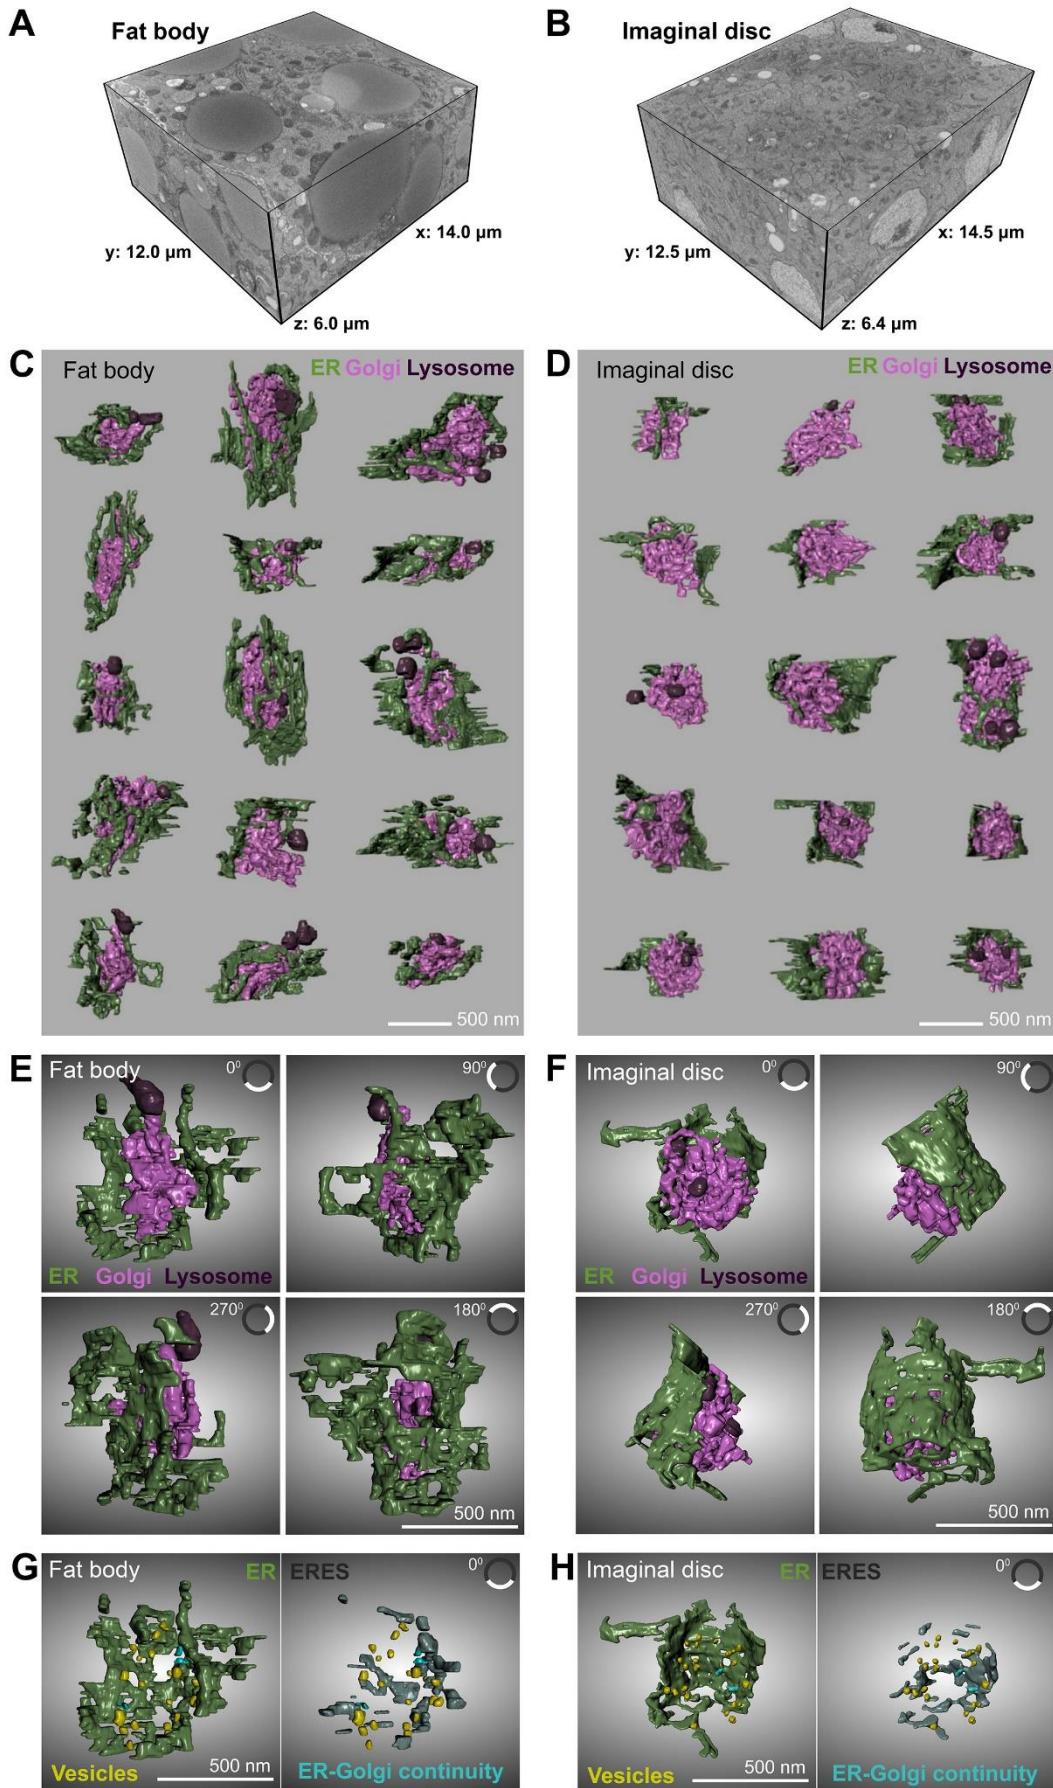

642 **Figure 5. FIB-SEM analysis reveals a single continuous Golgi compartment per ERES-**  
643 **Golgi unit**

644 (A, B) Dimensions of two FIB-SEM volumes obtained from wild type third-instar larval fat  
645 body (A) and wing imaginal disc (B) tissues. See also Suppl. Video 1.

646 (C, D) 3D models of 15 fat body (C) and 15 imaginal disc (D) ERES-Golgi units reconstructed  
647 from FIB-SEM data. Different colors indicate ER (green), Golgi (light purple) and lysosome-  
648 related degradative structures (dark purple). See also Suppl. Video 2.

649 (E, F) Horizontally rotated views of single fat body (E) and imaginal disc (F) ERES-Golgi  
650 units, colored as in C and D. The rotation angle of each view is provided in the upper right  
651 corner of each panel. See also Suppl. Video 3 and 4.

652 (G, H) Frontal views of the ERES concavity in ERES-Golgi units from fat body (G, same unit  
653 as E) and imaginal disc (H, same unit as F). ER (left, green), ERES (right, grey), vesicles  
654 (yellow) and ER-Golgi continuities (blue) are represented.



655 **Figure 6. Tango1 expression increases ERES size**

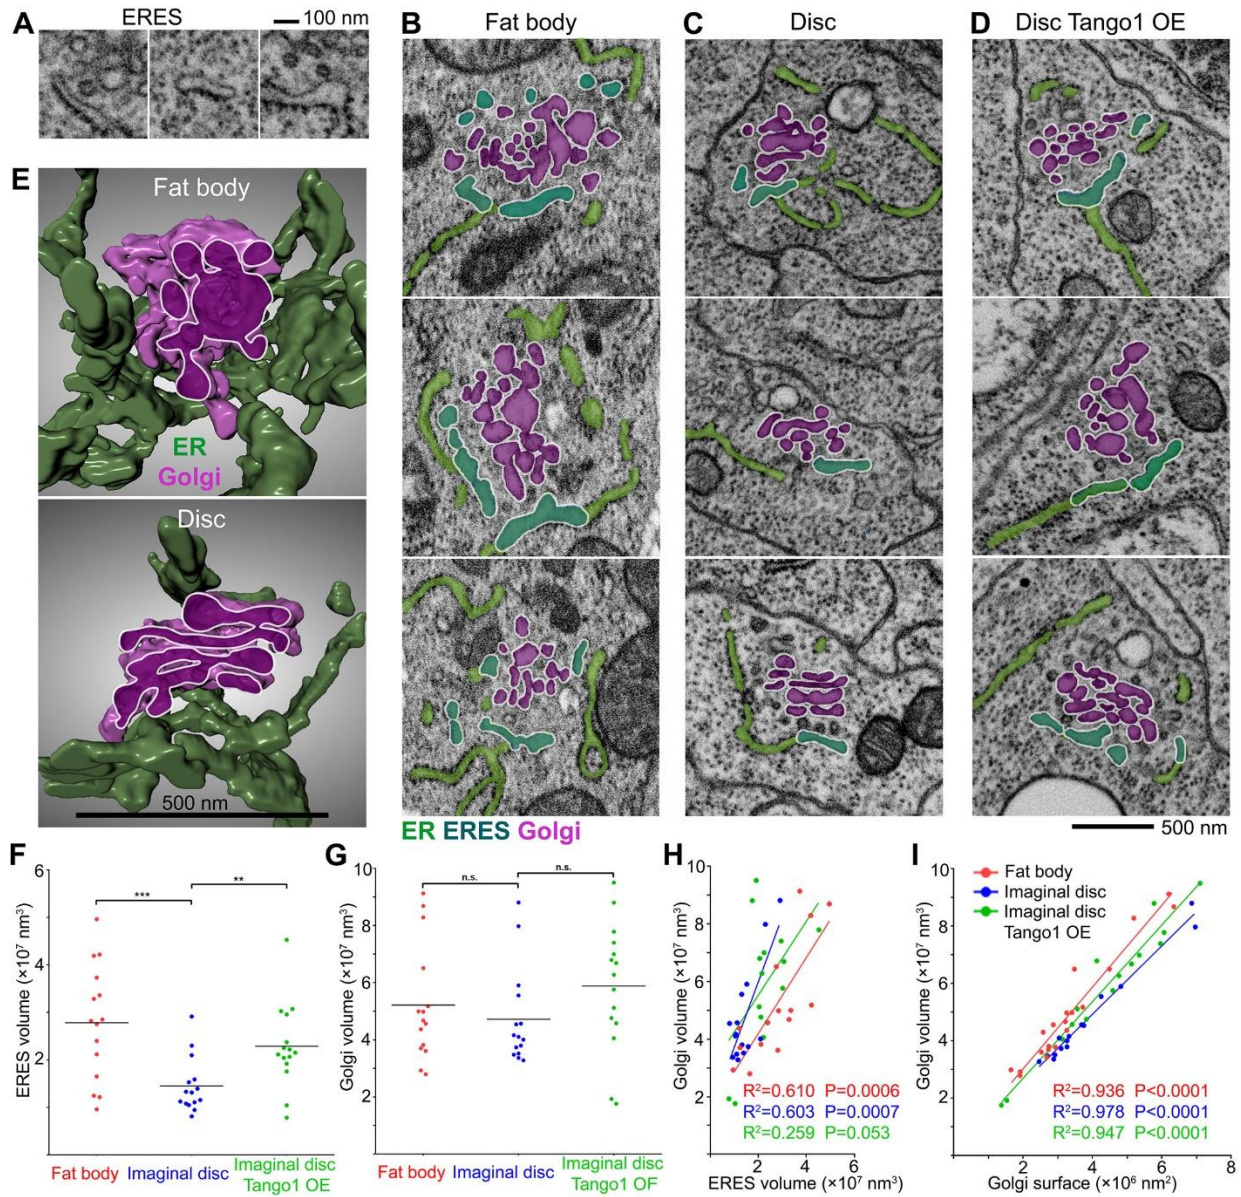

656 **Figure 6. Tango1 expression increases ERES size**

657 (A) FIB-SEM images featuring examples of ER devoid of ribosomes on its Golgi-facing side  
658 (ERES).

659 (B-D) FIB-SEM images of ERES-Golgi units from wild type fat body (B), wild type wing  
660 imaginal disc (C) and wing imaginal disc overexpressing Tango1 (D, *Act>SP.GFP.Tango1*).  
661 Superimposed colors indicate ER (light green), ERES (dark green) and Golgi (purple).

662 (E) 3D reconstructions of ERES-Golgi units from wild type fat body (top panel) and  
663 imaginal disc (bottom panel). ER (green) and Golgi (light purple) are depicted. A cis-trans  
664 section through the Golgi is shown (dark purple).

665 (F, G) Quantification of ERES (F) and Golgi (G) volume as measured in 3D models of ERES-  
666 Golgi units. Each dot represents a single ERES-Golgi unit from wild type fat body (red),  
667 wild type imaginal disc (blue) and Tango1-overexpressing imaginal disc  
668 (*Act>SP.GFP.Tango1*, green). Horizontal lines represent mean values. Significance was  
669 determined using two-tailed t tests. Fat body ERES (n=15) vs. imaginal disc ERES (n=15),  
670  $p=0.001$  (\*\*\*). Imaginal disc ERES (n=15) vs. imaginal disc Tango1 OE ERES (n=15),  
671  $p=0.0048$  (\*\*). Fat body Golgi (n=15) vs. imaginal disc Golgi (n=15),  $p=0.4728$  (not  
672 significant). Imaginal disc Golgi (n=15) vs. imaginal disc Tango1 OE Golgi (n=15),  $p=0.1879$   
673 (not significant).

674 (H, I) Correlation Golgi volume vs. Golgi surface (H) and Golgi volume vs ERES volume (I),  
675 as measured in 3D models of ERES-Golgi units. Each dot represents a single ERES-Golgi  
676 unit (n=15 in each group) from wild type fat body (red), wild type imaginal disc (blue) and  
677 Tango1-overexpressing imaginal disc (*Act>SP.GFP.Tango1*, green). P value and  $R^2$  were  
678 determined using linear regression tests.



679 **Figure 7. Analysis of vesicles in the ER-Golgi interface**

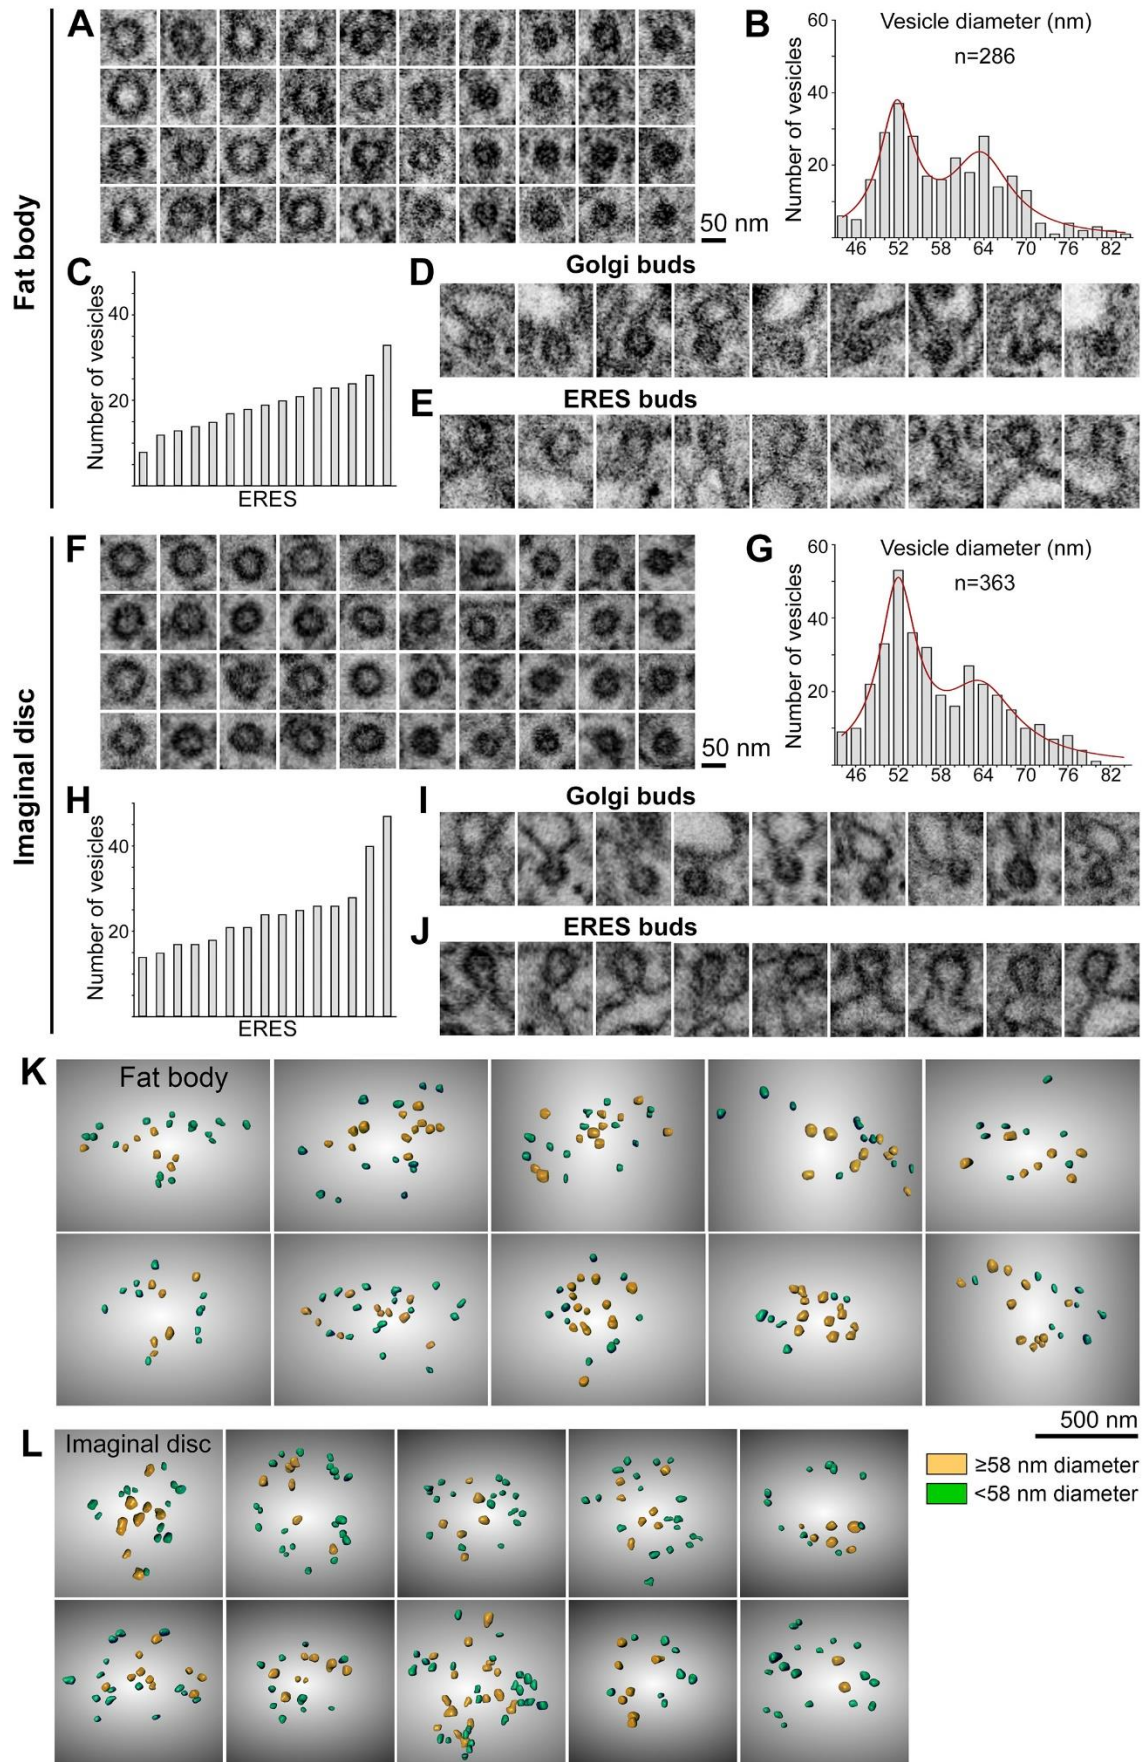

680 **Figure 7. Analysis of vesicles in the ER-Golgi interface**

681 (A, F) FIB-SEM images of vesicles found in ERES-Golgi units of wild type fat body (A) and  
682 wing imaginal disc (F) tissues.

683 (B, G) Frequency distribution of vesicle diameters in the ER-Golgi interface of 15 fat body  
684 (B) and 15 imaginal disc (G) ERES-Golgi units. The red line fits the distribution to a sum of  
685 Lorentzians curve. Diameter of a vesicle was measured on FIB-SEM images directly, not  
686 on 3D models, as the maximum diameter in any FIB-SEM section of that vesicle (Z-  
687 resolution of our data was 20 nm).

688 (C, H) Number of vesicles in 15 fat body (C) and 15 imaginal disc (H) ERES-Golgi units. Each  
689 column represents an individual ERES.

690 (D, E, I, J) FIB-SEM images of buds found in Golgi (D, I) and ERES (E, J) of fat body (D, E)  
691 and imaginal disc (I, J) tissues.

692 (K, L) Frontal views of the ERES concavity from 3D models of fat body (K) and imaginal disc  
693 (L) ERES-Golgi units showing the spatial distribution of vesicles. Vesicles larger and smaller  
694 than 58 nm in diameter are represented in yellow and green, respectively.



696 **Figure 8. ERES-Golgi connection through pearled tubular continuities**

697 (A, B) FIB-SEM images of one-beaded and two-beaded (B) tubes connecting ERES and  
698 Golgi. In top panels, ER, Golgi and connecting tubes are pseudocolored in green, purple  
699 and cyan, respectively. Bottom panels show the original image.

700 (C) Percentage of one-beaded, two-beaded and three-beaded ERES-Golgi continuities  
701 from the total observed in 15 ERES-Golgi units from fat body (n=45 continuities), 15 from  
702 imaginal disc (n=49) and 15 from Tango1-overexpressing imaginal discs (n=39).

703 (D, E) FIB-SEM images of two-beaded (D) and three-beaded (E) tubes extending from ERES.  
704 In top panels, ER, Golgi and ERES tubes are pseudocolored in green, purple and cyan,  
705 respectively. Bottom panels show the original image.

706 (F) Number of ERES-Golgi continuities in each ERES-Golgi unit analyzed. Each dot  
707 represents an ERES-Golgi unit (n=15 in each group). Horizontal lines mark mean values.

708 (G, H) Frontal views of the ERES concavity from 3D models of fat body (G) and imaginal  
709 disc (H) ERES-Golgi units showing the position of ERES-Golgi continuities (cyan) in relation  
710 to ERES (grey).

711 **SUPPLEMENTAL MATERIALS**

712 **Fig. S1. ER contacts with other organelles**

713 **Fig. S2. FIB-SEM analysis of ERES-Golgi units in Tango1-overexpressing discs cells**

714 **Table S1. Detailed genotypes**

715 Genotypes of animals in all experiments, listed by figure.

716 **Table S2. Primers**

717 PCR primers used in generation of constructs described in Materials and Methods.

718 **Video S1. FIB-SEM volumes**

719 Serial FIB-SEM registered images of wild type fat body and wild type wing imaginal disc  
720 samples, walking through the whole tissue volume in Z-direction.

721 **Video S2. 3D reconstruction of ERES-Golgi units from FIB-SEM data**

722 3D reconstructions of 15 wild type fat body, 15 wild type wing imaginal disc and 15 Tango1  
723 overexpression wing imaginal disc (*Act>SP.GFP.Tango1*). ER is shown in green, Golgi in  
724 light purple and lysosomes in dark purple.

725 **Video S3. 3D model of a fat body ERES-Golgi unit**

726 3D reconstruction of an ERES-Golgi unit from wild type fat body. ER is shown in green,  
727 Golgi in light purple, lysosomes in dark purple, vesicles in yellow and ERES-Golgi tubules  
728 in blue.

729 **Video S4. 3D model of a wing imaginal disc ERES-Golgi unit**

730 3D reconstruction of an ERES-Golgi unit from wild type wing imaginal disc tissue. ER is  
731 shown in green, Golgi in light purple, lysosomes in dark purple, vesicles in yellow and  
732 ERES-Golgi tubules in blue.



733 Fig. S1. ER contacts with other organelles

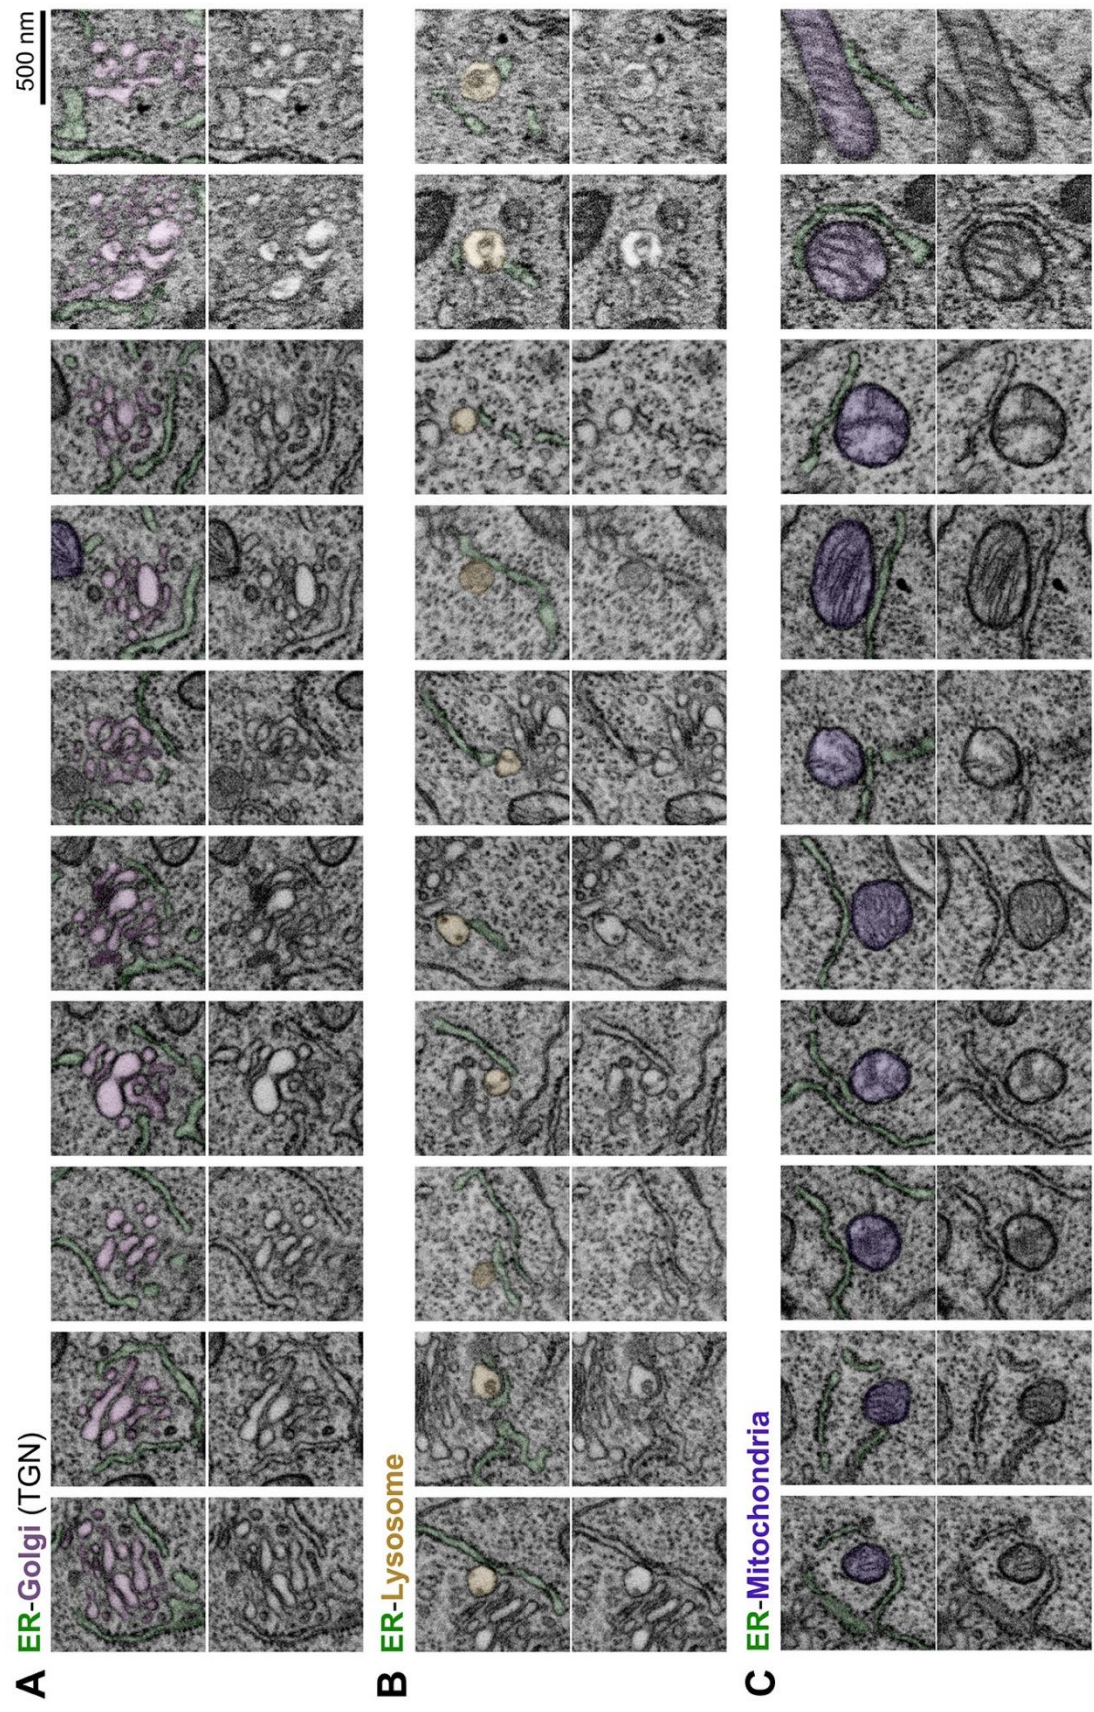

734 **Fig. S1. ER contacts with other organelles**

735 FIB-SEM images exemplifying ER-TGN (A), ER-Lysosome (B) and ER-Mitochondria (C)  
736 contact sites. In top panels, ER, Golgi, mitochondria and lysosome are pseudocolored in  
737 green, light purple, dark purple and yellow, respectively. Bottom panels show the original  
738 image.

739 **Fig. S2. FIB-SEM analysis of ERES-Golgi units in Tango1-overexpressing imaginal disc**  
740 **cells**

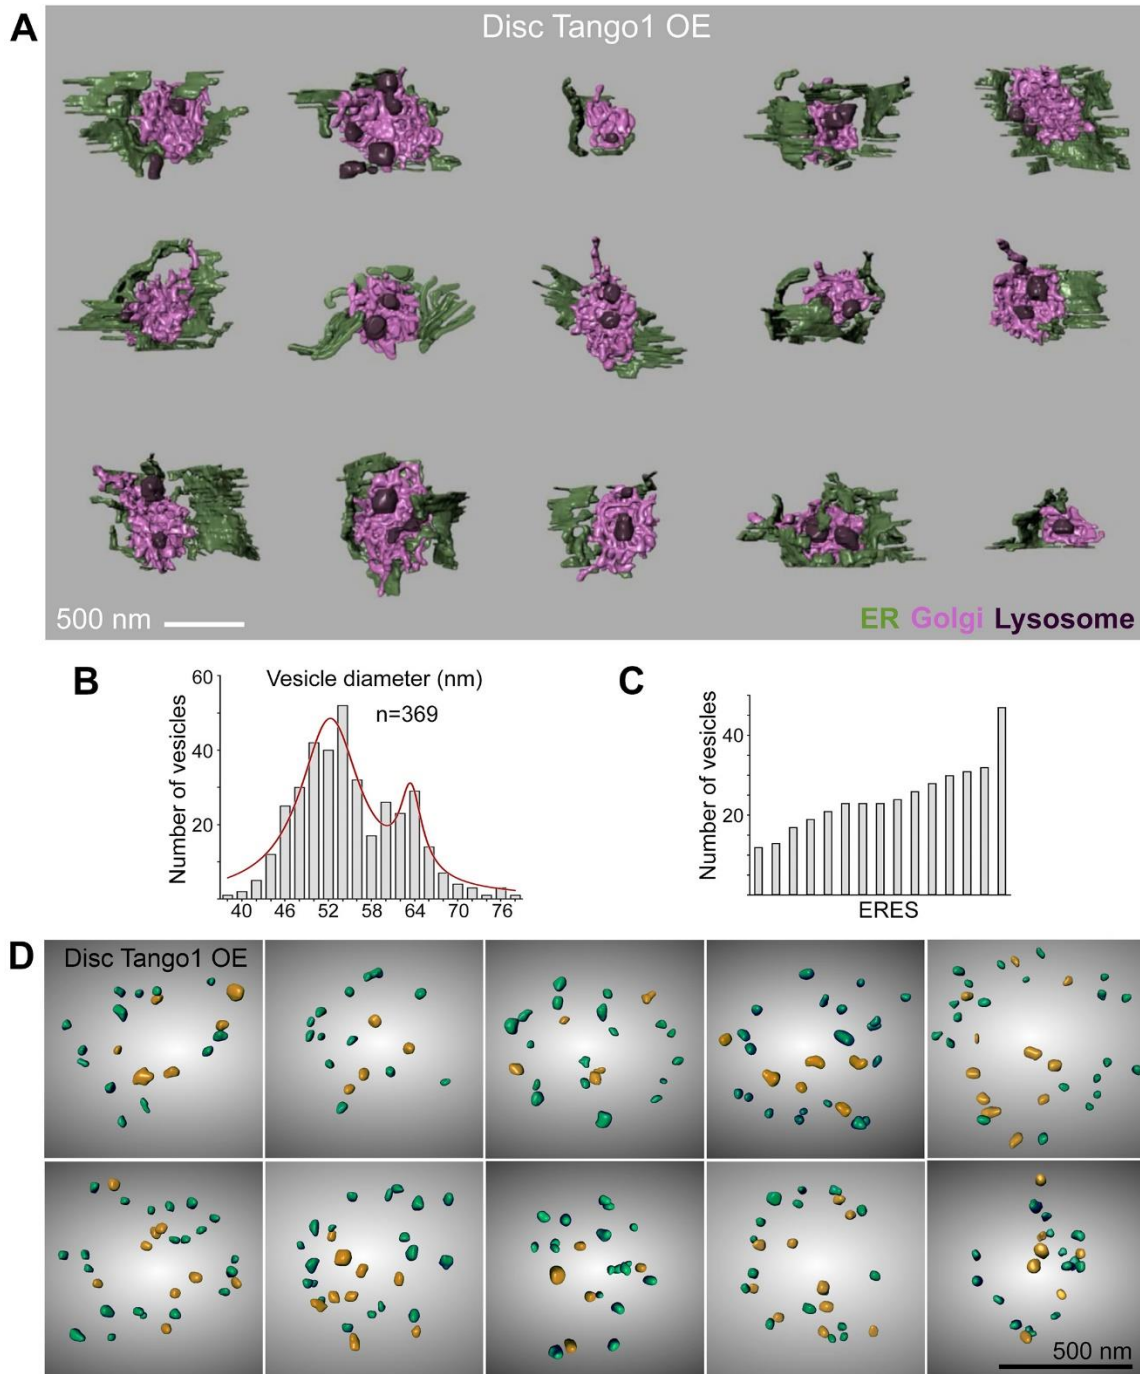



741 **Fig. S2. FIB-SEM analysis of ERES-Golgi units in Tango1-overexpressing imaginal disc**  
742 **cells**

743 (A) 3D models of 15 ERES-Golgi units reconstructed from FIB-SEM data of Tango1-  
744 overexpressing wing imaginal disc tissue (*Act>SP.GFP.Tango1*). Different colors represent  
745 ER (green), Golgi (light purple) and lysosome-related degradative structures (dark purple).

746 (B) Frequency distribution of vesicle diameters in the ER-Golgi interface of ERES-Golgi  
747 units from Tango1-overexpressing imaginal disc tissue. The red line fits the distribution to  
748 a sum of Lorentzians curve.

749 (C) Number of vesicles in 15 ERES-Golgi units of Tango1-overexpressing disc cells. Each  
750 column represents an individual ERES.

751 (D) Frontal views of the ERES concavity from 3D models of ERES-Golgi units of Tango1-  
752 overexpressing disc tissue. Vesicles larger and smaller than 58 nm in diameter are  
753 represented in yellow and green, respectively.

754 **REFERENCES**

- 755 Appenzeller-Herzog, C., and H.-P. Hauri. 2006. The ER-Golgi intermediate compartment (ERGIC):  
756 in search of its identity and function. *Journal of Cell Science*. 119:2173-2183.
- 757 Bacia, K., E. Futai, S. Prinz, A. Meister, S. Daum, D. Glatte, J.A.G. Briggs, and R. Schekman. 2011.  
758 Multibudded tubules formed by COPII on artificial liposomes. *Scientific Reports*. 1:17.
- 759 Bannykh, S.I., T. Rowe, and W.E. Balch. 1996. The organization of endoplasmic reticulum export  
760 complexes. *J Cell Biol*. 135:19-35.
- 761 Bard, F., L. Casano, A. Mallabiabarrena, E. Wallace, K. Saito, H. Kitayama, G. Guizzunti, Y. Hu, F.  
762 Wendler, R. Dasgupta, N. Perrimon, and V. Malhotra. 2006. Functional genomics reveals  
763 genes involved in protein secretion and Golgi organization. *Nature*. 439:604-607.
- 764 Barlowe, C., L. Orci, T. Yeung, M. Hosobuchi, S. Hamamoto, N. Salama, M.F. Rexach, M. Ravazzola,  
765 M. Amherdt, and R. Schekman. 1994. COPII: A membrane coat formed by Sec proteins  
766 that drive vesicle budding from the endoplasmic reticulum. *Cell*. 77:895-907.
- 767 Barlowe, C.K., and E.A. Miller. 2013. Secretory protein biogenesis and traffic in the early secretory  
768 pathway. *Genetics*. 193:383-410.
- 769 Brand, A.H., and N. Perrimon. 1993. Targeted gene expression as a means of altering cell fates  
770 and generating dominant phenotypes. *Development (Cambridge, England)*. 118:401-415.
- 771 Brandizzi, F., and C. Barlowe. 2013. Organization of the ER-Golgi interface for membrane traffic  
772 control. *Nat Rev Mol Cell Biol*. 14:382-392.
- 773 Bykov, Y.S., M. Schaffer, S.O. Dodonova, S. Albert, J.M. Plitzko, W. Baumeister, B.D. Engel, and J.A.  
774 Briggs. 2017. The structure of the COPI coat determined within the cell. *Elife*. 6.
- 775 Canty, E.G., and K.E. Kadler. 2005. Procollagen trafficking, processing and fibrillogenesis. *J Cell Sci*.  
776 118:1341-1353.
- 777 Casler, J.C., A.L. Zajac, F.M. Valbuena, D. Sparvoli, O. Jeyifous, A.P. Turkewitz, S. Horne-Badovinac,  
778 W.N. Green, and B.S. Glick. 2020. ESCargo: a regulatable fluorescent secretory cargo for  
779 diverse model organisms. *Molecular Biology of the Cell*. 31:2892-2903.
- 780 daSilva, L.L., E.L. Snapp, J. Denecke, J. Lippincott-Schwartz, C. Hawes, and F. Brandizzi. 2004.  
781 Endoplasmic reticulum export sites and Golgi bodies behave as single mobile secretory  
782 units in plant cells. *Plant Cell*. 16:1753-1771.
- 783 Davis, M.N., S. Horne-Badovinac, and A. Naba. 2019. In-silico definition of the *Drosophila*  
784 *melanogaster* matrisome. *Matrix Biology Plus*. 4:100015.
- 785 Farhan, H., M. Weiss, K. Tani, R.J. Kaufman, and H.P. Hauri. 2008. Adaptation of endoplasmic  
786 reticulum exit sites to acute and chronic increases in cargo load. *Embo j*. 27:2043-2054.
- 787 Feng, Z., K. Yang, and J.C. Pastor-Pareja. 2021. Tales of the ER-Golgi Frontier: *Drosophila*-Centric  
788 Considerations on Tango1 Function. *Frontiers in cell and developmental biology*. 8.
- 789 Fromme, J.C., and R. Schekman. 2005. COPII-coated vesicles: flexible enough for large cargo? *Curr*  
790 *Opin Cell Biol*. 17:345-352.
- 791 Gallo, R., A. Rai, and L. Pelkmans. 2020. DYRK3-Controlled Phase Separation Organizes the Early  
792 Secretory Pathway. *bioRxiv:2020.2002.2010.941757*.



- 793 Glick, B.S., and A. Nakano. 2009. Membrane traffic within the Golgi apparatus. *Annu Rev Cell Dev*  
794 *Biol.* 25:113-132.
- 795 Gorur, A., L. Yuan, S.J. Kenny, S. Baba, K. Xu, and R. Schekman. 2017. COPII-coated membranes  
796 function as transport carriers of intracellular procollagen I. *J Cell Biol.* 216:1745-1759.
- 797 Hammond, A.T., and B.S. Glick. 2000. Dynamics of transitional endoplasmic reticulum sites in  
798 vertebrate cells. *Mol Biol Cell.* 11:3013-3030.
- 799 Hanna, M.G., J.L. Peotter, E.B. Frankel, and A. Audhya. 2018. Membrane Transport at an Organelle  
800 Interface in the Early Secretory Pathway: Take Your Coat Off and Stay a While: Evolution  
801 of the metazoan early secretory pathway. *BioEssays : news and reviews in molecular,*  
802 *cellular and developmental biology.* 40:e1800004.
- 803 Hughes, H., A. Budnik, K. Schmidt, K.J. Palmer, J. Mantell, C. Noakes, A. Johnson, D.A. Carter, P.  
804 Verkade, P. Watson, and D.J. Stephens. 2009. Organisation of human ER-exit sites:  
805 requirements for the localisation of Sec16 to transitional ER. *J Cell Sci.* 122:2924-2934.
- 806 Jensen, D., and R. Schekman. 2011. COPII-mediated vesicle formation at a glance. *J Cell Sci.* 124:1-  
807 4.
- 808 Jin, L., K.B. Pahuja, K.E. Wickliffe, A. Gorur, C. Baumgartel, R. Schekman, and M. Rape. 2012.  
809 Ubiquitin-dependent regulation of COPII coat size and function. *Nature.* 482:495-500.
- 810 Ke, H., Z. Feng, M. Liu, T. Sun, J. Dai, M. Ma, L.P. Liu, J.Q. Ni, and J.C. Pastor-Pareja. 2018. Collagen  
811 secretion screening in *Drosophila* supports a common secretory machinery and multiple  
812 Rab requirements. *J Genet Genomics.*
- 813 Kondylis, V., S.E. Goulding, J.C. Dunne, and C. Rabouille. 2001. Biogenesis of Golgi stacks in  
814 imaginal discs of *Drosophila melanogaster*. *Mol Biol Cell.* 12:2308-2327.
- 815 Kondylis, V., and C. Rabouille. 2003. A novel role for dp115 in the organization of tER sites in  
816 *Drosophila*. *J Cell Biol.* 162:185-198.
- 817 Kondylis, V., and C. Rabouille. 2009. The Golgi apparatus: lessons from *Drosophila*. *FEBS Lett.*  
818 583:3827-3838.
- 819 Kondylis, V., K.M. Spoorendonk, and C. Rabouille. 2005. dGRASP localization and function in the  
820 early exocytic pathway in *Drosophila* S2 cells. *Mol Biol Cell.* 16:4061-4072.
- 821 Kondylis, V., Y. Tang, F. Fuchs, M. Boutros, and C. Rabouille. 2011. Identification of ER Proteins  
822 Involved in the Functional Organisation of the Early Secretory Pathway in *Drosophila* Cells  
823 by a Targeted RNAi Screen. *PLOS ONE.* 6:e17173.
- 824 Kurokawa, K., M. Okamoto, and A. Nakano. 2014. Contact of cis-Golgi with ER exit sites executes  
825 cargo capture and delivery from the ER. *Nat Commun.* 5:3653.
- 826 Langhans, M., T. Meckel, A. Kress, A. Lerich, and D.G. Robinson. 2012. ERES (ER exit sites) and the  
827 "secretory unit concept". *J Microsc.* 247:48-59.
- 828 Lee, M.C.S., E.A. Miller, J. Goldberg, L. Orci, and R. Schekman. 2004. BI-DIRECTIONAL PROTEIN  
829 TRANSPORT BETWEEN THE ER AND GOLGI. *Annual Review of Cell and Developmental*  
830 *Biology.* 20:87-123.
- 831 Lerner, D.W., D. McCoy, A.J. Isabella, A.P. Mahowald, G.F. Gerlach, T.A. Chaudhry, and S. Horne-  
832 Badovinac. 2013. A Rab10-dependent mechanism for polarized basement membrane  
833 secretion during organ morphogenesis. *Dev Cell.* 24:159-168.

- 834 Liu, M., Z. Feng, H. Ke, Y. Liu, T. Sun, J. Dai, W. Cui, and J.C. Pastor-Pareja. 2017. Tango1 spatially  
835 organizes ER exit sites to control ER export. *J Cell Biol.* 216:1035-1049.
- 836 Lunstrum, G.P., H.P. Bächinger, L.I. Fessler, K.G. Duncan, R.E. Nelson, and J.H. Fessler. 1988.  
837 Drosophila basement membrane procollagen IV. I. Protein characterization and  
838 distribution. *J Biol Chem.* 263:18318-18327.
- 839 Maeda, M., Y. Komatsu, and K. Saito. 2020. Mitotic ER Exit Site Disassembly and Reassembly Are  
840 Regulated by the Phosphorylation Status of TANGO1. *Dev Cell.*
- 841 Malhotra, V., and P. Erlmann. 2015. The pathway of collagen secretion. *Annu Rev Cell Dev Biol.*  
842 31:109-124.
- 843 Marra, P., T. Maffucci, T. Daniele, G.D. Tullio, Y. Ikehara, E.K. Chan, A. Luini, G. Beznoussenko, A.  
844 Mironov, and M.A. De Matteis. 2001. The GM130 and GRASP65 Golgi proteins cycle  
845 through and define a subdomain of the intermediate compartment. *Nat Cell Biol.* 3:1101-  
846 1113.
- 847 Martell, J.D., T.J. Deerinck, S.S. Lam, M.H. Ellisman, and A.Y. Ting. 2017. Electron microscopy using  
848 the genetically encoded APEX2 tag in cultured mammalian cells. *Nat Protoc.* 12:1792-  
849 1816.
- 850 Martínez-Menárguez, J.A. 2013. Intra-Golgi Transport: Roles for Vesicles, Tubules, and Cisternae.  
851 *ISRN Cell Biology.* 2013:126731.
- 852 Matsui, Y., Y. Hirata, I. Wada, and N. Hosokawa. 2020. Visualization of Procollagen IV Reveals ER-  
853 to-Golgi Transport by ERGIC-independent Carriers. *Cell structure and function.* 45:107-  
854 119.
- 855 Matsuoka, K., L. Orci, M. Amherdt, S.Y. Bednarek, S. Hamamoto, R. Schekman, and T. Yeung. 1998.  
856 COPII-Coated Vesicle Formation Reconstituted with Purified Coat Proteins and Chemically  
857 Defined Liposomes. *Cell.* 93:263-275.
- 858 McCaughey, J., N.L. Stevenson, S. Cross, and D.J. Stephens. 2019. ER-to-Golgi trafficking of  
859 procollagen in the absence of large carriers. *J Cell Biol.* 218:929-948.
- 860 Melville, D., A. Gorur, and R. Schekman. 2019. Fatty-acid binding protein 5 modulates the SAR1  
861 GTPase cycle and enhances budding of large COPII cargoes. *Mol Biol Cell.* 30:387-399.
- 862 Mironov, A.A., and G.V. Beznoussenko. 2019. Models of Intracellular Transport: Pros and Cons.  
863 *Frontiers in cell and developmental biology.* 7:146.
- 864 Mironov, A.A., A.A. Mironov, Jr., G.V. Beznoussenko, A. Trucco, P. Lupetti, J.D. Smith, W.J.C.  
865 Geerts, A.J. Koster, K.N.J. Burger, M.E. Martone, T.J. Deerinck, M.H. Ellisman, and A. Luini.  
866 2003. ER-to-Golgi Carriers Arise through Direct En Bloc Protrusion and Multistage  
867 Maturation of Specialized ER Exit Domains. *Developmental Cell.* 5:583-594.
- 868 Narayan, K., and S. Subramaniam. 2015. Focused ion beams in biology. *Nat Methods.* 12:1021-  
869 1031.
- 870 Omari, S., E. Makareeva, L. Gorrell, M. Jarnik, J. Lippincott-Schwartz, and S. Leikin. 2020.  
871 Mechanisms of procollagen and HSP47 sorting during ER-to-Golgi trafficking. *Matrix  
872 biology : journal of the International Society for Matrix Biology.*

- 873 Omari, S., E. Makareeva, A. Roberts-Pilgrim, L. Mirigian, M. Jarnik, C. Ott, J. Lippincott-Schwartz,  
874 and S. Leikin. 2018. Noncanonical autophagy at ER exit sites regulates procollagen  
875 turnover. *Proc Natl Acad Sci U S A*. 115:E10099-e10108.
- 876 Pastor-Pareja, J.C. 2020. Atypical basement membranes and basement membrane diversity - what  
877 is normal anyway? *J Cell Sci*. 133.
- 878 Pastor-Pareja, J.C., and T. Xu. 2011. Shaping cells and organs in *Drosophila* by opposing roles of  
879 fat body-secreted Collagen IV and perlecan. *Dev Cell*. 21:245-256.
- 880 Polishchuk, R.S., M. Capestrano, and E.V. Polishchuk. 2009. Shaping tubular carriers for  
881 intracellular membrane transport. *FEBS Letters*. 583:3847-3856.
- 882 Rabouille, C., D.A. Kuntz, A. Lockyer, R. Watson, T. Signorelli, D.R. Rose, M. van den Heuvel, and  
883 D.B. Roberts. 1999. The *Drosophila* GMII gene encodes a Golgi alpha-mannosidase II.  
884 *Journal of Cell Science*. 112:3319-3330.
- 885 Raote, I., and V. Malhotra. 2021. Tunnels for Protein Export from the Endoplasmic Reticulum.  
886 *Annu Rev Biochem*.
- 887 Raote, I., M. Ortega Bellido, M. Pirozzi, C. Zhang, D. Melville, S. Parashuraman, T. Zimmermann,  
888 and V. Malhotra. 2017. TANGO1 assembles into rings around COPII coats at ER exit sites.  
889 *Journal of Cell Biology*. 216:901-909.
- 890 Reynolds, H.M., L. Zhang, D.T. Tran, and K.G. Ten Hagen. 2019. Tango1 coordinates the formation  
891 of endoplasmic reticulum/Golgi docking sites to mediate secretory granule formation. *J*  
892 *Biol Chem*. 294:19498-19510.
- 893 Riedel, F., A.K. Gillingham, C. Rosa-Ferreira, A. Galindo, and S. Munro. 2016. An antibody toolkit  
894 for the study of membrane traffic in *Drosophila melanogaster*. *Biol Open*. 5:987-992.
- 895 Rios-Barrera, L.D., S. Sigurbjornsdottir, M. Baer, and M. Leptin. 2017. Dual function for Tango1 in  
896 secretion of bulky cargo and in ER-Golgi morphology. *Proc Natl Acad Sci U S A*.  
897 114:E10389-E10398.
- 898 Ripoche, J., B. Link, J.K. Yucel, K. Tokuyasu, and V. Malhotra. 1994. Location of Golgi membranes  
899 with reference to dividing nuclei in syncytial *Drosophila* embryos. *Proc Natl Acad Sci U S*  
900 *A*. 91:1878-1882.
- 901 Robinson, D.G., F. Brandizzi, C. Hawes, and A. Nakano. 2015. Vesicles versus Tubes: Is Endoplasmic  
902 Reticulum-Golgi Transport in Plants Fundamentally Different from Other Eukaryotes?  
903 *Plant Physiol*. 168:393-406.
- 904 Roote, J., and A. Prokop. 2013. How to design a genetic mating scheme: a basic training package  
905 for *Drosophila* genetics. *G3 (Bethesda)*. 3:353-358.
- 906 Roy Chowdhury, S., C. Bhattacharjee, J.C. Casler, B.K. Jain, B.S. Glick, and D. Bhattacharyya. 2020.  
907 ER arrival sites associate with ER exit sites to create bidirectional transport portals. *J Cell*  
908 *Biol*. 219.
- 909 Rubin, G.M., and A.C. Spradling. 1982. Genetic transformation of *Drosophila* with transposable  
910 element vectors. *Science*. 218:348-353.
- 911 Santos, A.J., I. Raote, M. Scarpa, N. Brouwers, and V. Malhotra. 2015. TANGO1 recruits ERGIC  
912 membranes to the endoplasmic reticulum for procollagen export. *Elife*. 4.

- 913 Saraste, J., and M. Marie. 2018. Intermediate compartment (IC): from pre-Golgi vacuoles to a  
914 semi-autonomous membrane system. *Histochem Cell Biol.* 150:407-430.
- 915 Schekman, R. 2010. Charting the Secretory Pathway in a Simple Eukaryote. *Molecular Biology of*  
916 *the Cell.* 21:3781-3784.
- 917 Schröter, S., S. Beckmann, and H.D. Schmitt. 2016. ER arrival sites for COPI vesicles localize to  
918 hotspots of membrane trafficking. *Embo j.* 35:1935-1955.
- 919 Shindiapina, P., and C. Barlowe. 2010. Requirements for transitional endoplasmic reticulum site  
920 structure and function in *Saccharomyces cerevisiae*. *Mol Biol Cell.* 21:1530-1545.
- 921 Simpson, J.C., T. Nilsson, and R. Pepperkok. 2006. Biogenesis of Tubular ER-to-Golgi Transport  
922 Intermediates. *Molecular Biology of the Cell.* 17:723-737.
- 923 Sparkes, I.A., T. Ketelaar, N.C. de Ruijter, and C. Hawes. 2009. Grab a Golgi: laser trapping of Golgi  
924 bodies reveals in vivo interactions with the endoplasmic reticulum. *Traffic.* 10:567-571.
- 925 Tiwari, P., A. Kumar, R.N. Das, V. Malhotra, and K. VijayRaghavan. 2015. A Tendon Cell Specific  
926 RNAi Screen Reveals Novel Candidates Essential for Muscle Tendon Interaction. *PLoS One.*  
927 10:e0140976.
- 928 Trucco, A., R.S. Polishchuk, O. Martella, A. Di Pentima, A. Fusella, D. Di Giandomenico, E. San  
929 Pietro, G.V. Beznoussenko, E.V. Polishchuk, M. Baldassarre, R. Buccione, W.J. Geerts, A.J.  
930 Koster, K.N. Burger, A.A. Mironov, and A. Luini. 2004. Secretory traffic triggers the  
931 formation of tubular continuities across Golgi sub-compartments. *Nat Cell Biol.* 6:1071-  
932 1081.
- 933 Wendler, F., A.K. Gillingham, R. Sinka, C. Rosa-Ferreira, D.E. Gordon, X. Franch-Marro, A.A. Peden,  
934 J.P. Vincent, and S. Munro. 2010. A genome-wide RNA interference screen identifies two  
935 novel components of the metazoan secretory pathway. *EMBO J.* 29:304-314.
- 936 Westrate, L.M., M.J. Hoyer, M.J. Nash, and G.K. Voeltz. 2020. Vesicular and uncoated Rab1-  
937 dependent cargo carriers facilitate ER to Golgi transport. *Journal of Cell Science.*  
938 133:jcs239814.
- 939 Witte, K., A.L. Schuh, J. Hegermann, A. Sarkeshik, J.R. Mayers, K. Schwarze, J.R. Yates, 3rd, S. Eimer,  
940 and A. Audhya. 2011. TFG-1 function in protein secretion and oncogenesis. *Nat Cell Biol.*  
941 13:550-558.
- 942 Yuan, L., S.J. Kenny, J. Hemmati, K. Xu, and R. Schekman. 2018. TANGO1 and SEC12 are  
943 copackaged with procollagen I to facilitate the generation of large COPII carriers. *Proc*  
944 *Natl Acad Sci U S A.* 115:E12255-E12264.
- 945 Zang, Y., M. Wan, M. Liu, H. Ke, S. Ma, L.P. Liu, J.Q. Ni, and J.C. Pastor-Pareja. 2015. Plasma  
946 membrane overgrowth causes fibrotic collagen accumulation and immune activation in  
947 *Drosophila* adipocytes. *Elife.* 4:e07187.
- 948 Zeuschner, D., W.J. Geerts, E. van Donselaar, B.M. Humbel, J.W. Slot, A.J. Koster, and J.  
949 Klumperman. 2006. Immuno-electron tomography of ER exit sites reveals the existence  
950 of free COPII-coated transport carriers. *Nat Cell Biol.* 8:377-383.
- 951 Zhang, C., and C. Rabouille. 2019. Membrane-Bound Meet Membraneless in Health and Disease.  
952 *Cells.* 8.
- 953
